# Supplementary material for: Overall similarity and consistency assessment scores are not sufficiently accurate for predicting discrepancy between direct and indirect comparison estimates
Source: PubMed Central journal article supplement (PMC3537077; doi:10.1016/j.jclinepi.2012.06.022), 2013-02
Supplement: mmc1.pdf [file mmc1.pdf]

## Assessment of trial similarity and evidence consistency for indirect treatment comparisons: an empirical investigation

### LIST OF SUPPLEMENTAL FILES

#### Supporting Figures:

Figure S1: Agreement between two independent assessors in the assessment of trial similarity and evidence consistency

Figure S2: Mean disagreement (95% CI) between two independent assessors in final similarity and consistency scores.

#### Supporting Tables:

Table S1: Main characteristics of included CSRs and similarity/consistency assessment scores

Table S2: Evidence table for data extraction from trials included in CSRs

Table S3: TSA sheet for clinical similarity assessment

Table S4: QSA sheet for Quality assessment of trials in meta-analysis

Table S5: ECA sheet for evidence consistency assessment

Table S6: Evidence table – topical azelaic acid vs. topical metronidazole for rosacea (case study CD003262)

Table S7: Clinical similarity assessment results - case study (CD003262)

Table S8: ECA- evidence consistency assessment results –case study (CD003262)

Table S9: Assessment of quality of studies included – case study (CD003262)

**Figure S1:** Agreement between two independent assessors in the assessment of trial similarity and evidence consistency (Note: d –difference in the score between two assessors, SD –standard deviation, SE – standard error)

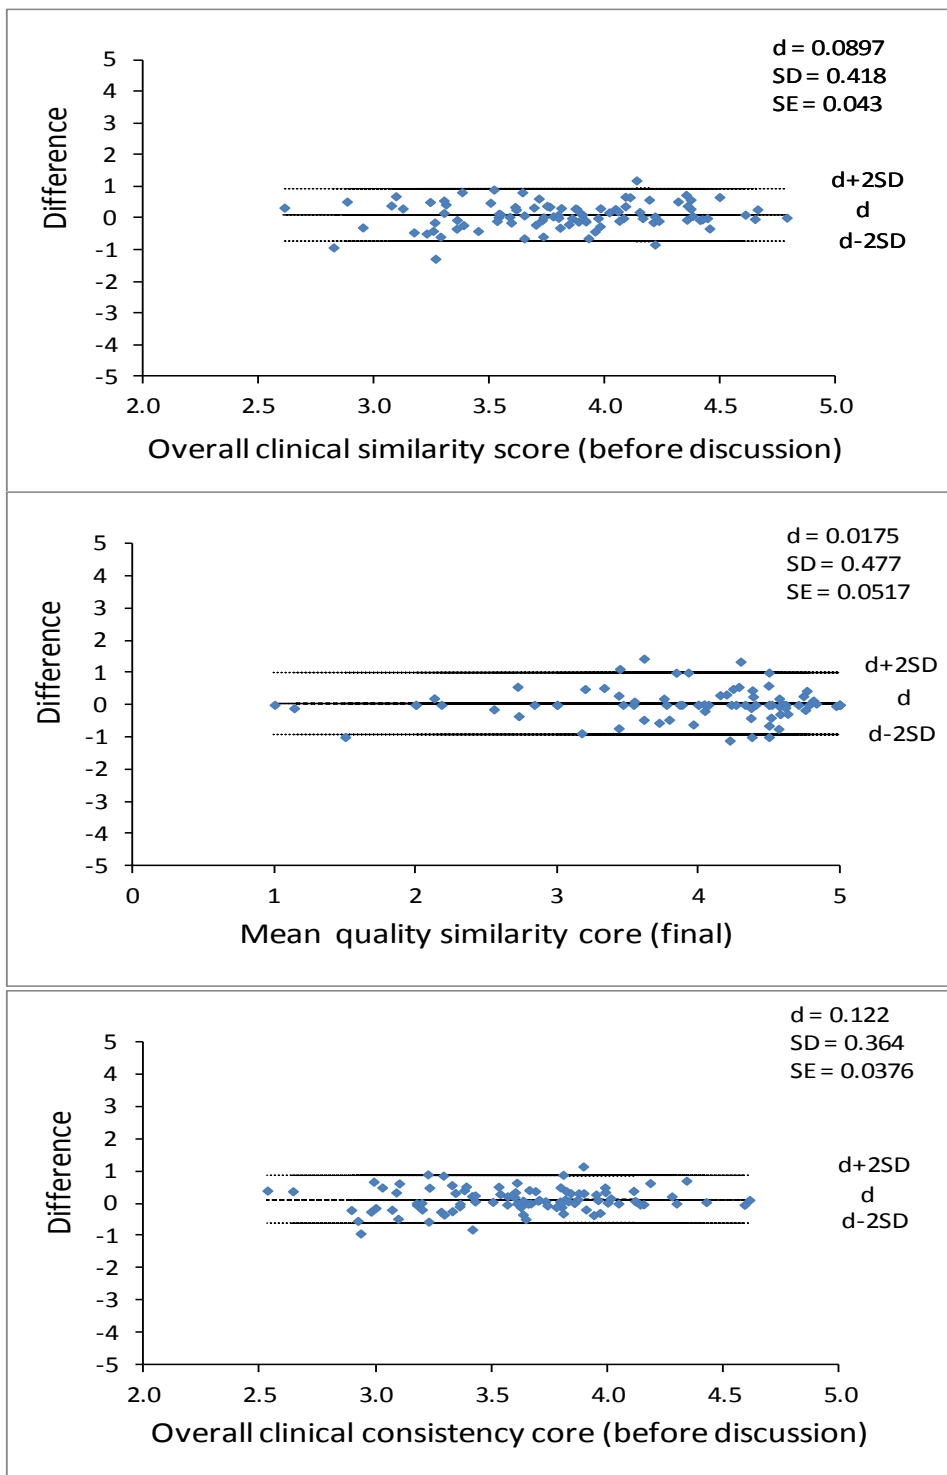

**Figure S2:** Mean disagreement (95% CI) between two independent assessors in final similarity and consistency scores (d=0 refers no difference in similarity/consistency scores between the two assessors)

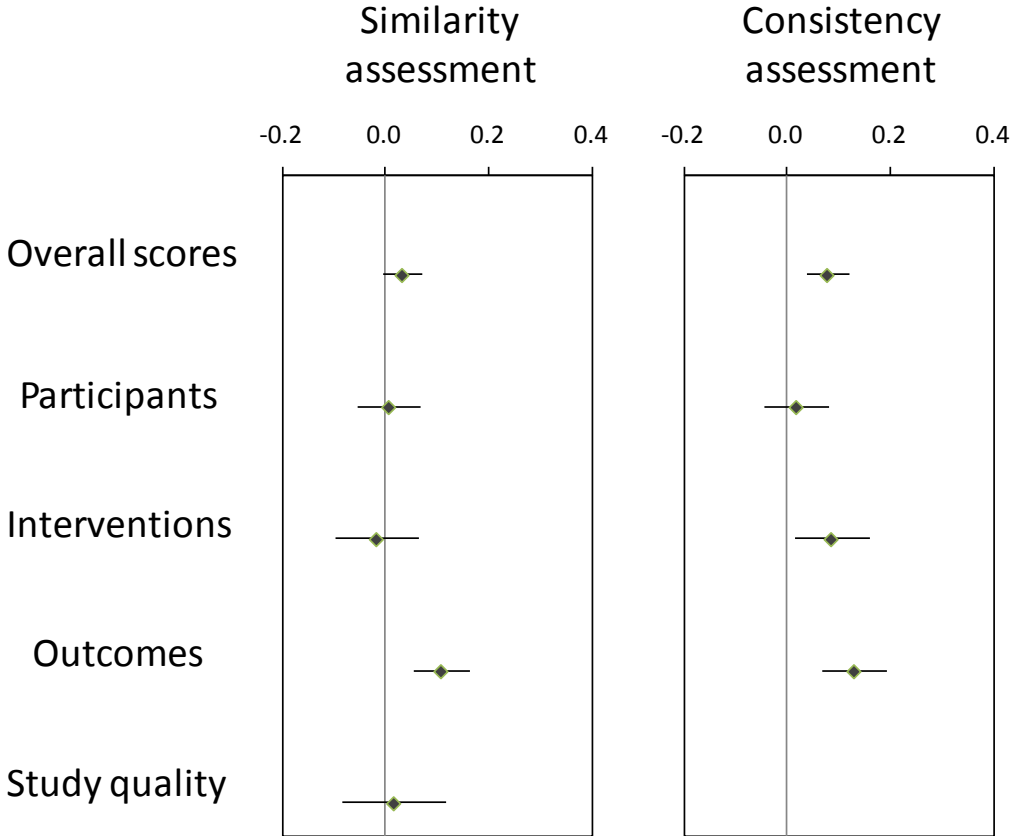

**Table S1:** Main characteristics of included CSRs and similarity/consistency assessment scores (TSA – Trial Similarity Assessment; ECA – Evidence Consistency Assessment; PSS – participant similarity score; ISS –intervention similarity score, OSS – outcome similarity score, TSS – average total similarity score, QSS –quality similarity score; PCS –participant consistency score, ICS –intervention consistency score, OCS – outcome consistency score, TCS –average total consistency score)

| CSR      | Clinical indications        | Treatment (B; C; A)                                                        | Outcome measures                  | No.of trials (patients):<br>BvC, AvB, AvC | Delta (SE)        | TSA scores |      | ECA scores |      |
|----------|-----------------------------|----------------------------------------------------------------------------|-----------------------------------|-------------------------------------------|-------------------|------------|------|------------|------|
|          |                             |                                                                            |                                   |                                           |                   |            |      |            |      |
| CD000053 | Urinary Schistosomiasis     | B: Praziquantel<br>C: Metrifonate<br>A: Placebo                            | Parasitological failure (1-12mon) | 5 (1757)<br>2 (473)<br>4 (533)            | -1.005<br>(1.442) | PSS        | 3.42 | PCS        | 3.09 |
|          |                             |                                                                            |                                   |                                           |                   | ISS        | 3.96 | ICS        | 4.11 |
|          |                             |                                                                            |                                   |                                           |                   | OSS        | 3.25 | OCS        | 3.17 |
|          |                             |                                                                            |                                   |                                           |                   | TSS        | 3.54 | TCS        | 3.45 |
|          |                             |                                                                            |                                   |                                           |                   | QSS        | 2.84 |            |      |
| CD000146 | Smokers                     | B: NRT patch<br>C: NRT spray<br>A: Placebo or no-NRT                       | Cessation rate                    | 2 (1272)<br>41 (18237)<br>4 (887)         | -0.348<br>(0.273) | PSS        | 3.00 | PCS        | 2.92 |
|          |                             |                                                                            |                                   |                                           |                   | ISS        | 2.44 | ICS        | 2.38 |
|          |                             |                                                                            |                                   |                                           |                   | OSS        | 3.17 | OCS        | 3.17 |
|          |                             |                                                                            |                                   |                                           |                   | TSS        | 2.87 | TCS        | 2.82 |
|          |                             |                                                                            |                                   |                                           |                   | QSS        | 4.92 |            |      |
| CD000165 | Smokers                     | B: Multiple visit<br>C: single visit<br>A: Usual care                      | Smoking cessation                 | 5 (1254)<br>5 (4174)<br>18 (14675)        | -0.003<br>(0.271) | PSS        | 3.05 | PCS        | 3.00 |
|          |                             |                                                                            |                                   |                                           |                   | ISS        | 2.75 | ICS        | 2.68 |
|          |                             |                                                                            |                                   |                                           |                   | OSS        | 3.17 | OCS        | 3.17 |
|          |                             |                                                                            |                                   |                                           |                   | TSS        | 2.99 | TCS        | 2.95 |
|          |                             |                                                                            |                                   |                                           |                   | QSS        | 3.75 |            |      |
| CD000184 | Breech presentation         | B: Betamimetic<br>C: Nitric oxide donor<br>A: Control                      | Failed external cephalic version  | 2 (109)<br>6 (617)<br>2 (156)             | -0.131<br>(0.940) | PSS        | 4.05 | PCS        | 3.55 |
|          |                             |                                                                            |                                   |                                           |                   | ISS        | 4.67 | ICS        | 3.43 |
|          |                             |                                                                            |                                   |                                           |                   | OSS        | 5.00 | OCS        | 5.00 |
|          |                             |                                                                            |                                   |                                           |                   | TSS        | 4.57 | TCS        | 3.99 |
|          |                             |                                                                            |                                   |                                           |                   | QSS        | 3.95 |            |      |
| CD000195 | Asthma (acute exacerbation) | B: Intramuscular corticosteroids<br>C: Oral corticosteroids;<br>A: Placebo | Relapse rates                     | 1 (36)<br>1 (56)<br>3 (221)               | 2.130<br>(3.29)   | PSS        | 3.29 | PCS        | 3.00 |
|          |                             |                                                                            |                                   |                                           |                   | ISS        | 3.25 | ICS        | 3.18 |
|          |                             |                                                                            |                                   |                                           |                   | OSS        | 4.00 | OCS        | 4.00 |
|          |                             |                                                                            |                                   |                                           |                   | TSS        | 3.51 | TCS        | 3.39 |
|          |                             |                                                                            |                                   |                                           |                   | QSS        | 4.50 |            |      |

| CSR      | Clinical indications                                 | Treatment (B; C; A)                                                           | Outcome measures                                | No.of trials<br>(patients):<br>BvC, AvB, AvC | Delta<br>(SE)     | TSA scores |      | ECA scores |      |
|----------|------------------------------------------------------|-------------------------------------------------------------------------------|-------------------------------------------------|----------------------------------------------|-------------------|------------|------|------------|------|
|          |                                                      |                                                                               |                                                 |                                              |                   |            |      |            |      |
| CD000218 | Trichomoniasis                                       | B: Metronidazole<br>C: Nimorazole<br>A: Ornidazole                            | No parasitological cure                         | 7 (920)<br>1 (48)<br>1 (58)                  | -3.179<br>(1.831) | PSS        | 3.38 | PCS        | 3.02 |
|          |                                                      |                                                                               |                                                 |                                              |                   | ISS        | 3.42 | ICS        | 3.18 |
|          |                                                      |                                                                               |                                                 |                                              |                   | OSS        | 3.25 | OCS        | 3.25 |
|          |                                                      |                                                                               |                                                 |                                              |                   | TSS        | 3.35 | TCS        | 3.15 |
|          |                                                      |                                                                               |                                                 |                                              |                   | QSS        | 3.63 |            |      |
| CD000227 | Fractures associated with involution or osteoporosis | B: Vitamins D + Calcium<br>C: Vitamin D<br>A: Placebo or control              | New hip fracture                                | 3 (2832)<br>4 (15848)<br>4 (5283)            | 0.533<br>(0.257)  | PSS        | 3.07 | PCS        | 3.07 |
|          |                                                      |                                                                               |                                                 |                                              |                   | ISS        | 2.59 | ICS        | 3.04 |
|          |                                                      |                                                                               |                                                 |                                              |                   | OSS        | 4.34 | OCS        | 4.34 |
|          |                                                      |                                                                               |                                                 |                                              |                   | TSS        | 3.33 | TCS        | 3.48 |
|          |                                                      |                                                                               |                                                 |                                              |                   | QSS        | 4.79 |            |      |
| CD000256 | Uncomplicated malaria                                | B: Artesunate<br>C: Artemether<br>A: Chloroquine                              | Parasite clearance at day 7                     | 4 (661)<br>1 (103)<br>1 (106)                | 1.765<br>(1.058)  | PSS        | 3.42 | PCS        | 2.88 |
|          |                                                      |                                                                               |                                                 |                                              |                   | ISS        | 5.00 | ICS        | 4.14 |
|          |                                                      |                                                                               |                                                 |                                              |                   | OSS        | 5.00 | OCS        | 5.00 |
|          |                                                      |                                                                               |                                                 |                                              |                   | TSS        | 4.47 | TCS        | 4.01 |
|          |                                                      |                                                                               |                                                 |                                              |                   | QSS        | 2.00 |            |      |
| CD000305 | Deep vein thrombosis                                 | B: LMW heparin<br>C: Unfractionated heparin<br>A: Placebo or no heparin       | Any DVT                                         | 3 (247)<br>3 (177)<br>10 (816)               | -0.244<br>(0.720) | PSS        | 3.85 | PCS        | 3.80 |
|          |                                                      |                                                                               |                                                 |                                              |                   | ISS        | 5.00 | ICS        | 3.82 |
|          |                                                      |                                                                               |                                                 |                                              |                   | OSS        | 3.17 | OCS        | 3.17 |
|          |                                                      |                                                                               |                                                 |                                              |                   | TSS        | 4.01 | TCS        | 3.60 |
|          |                                                      |                                                                               |                                                 |                                              |                   | QSS        | 4.31 |            |      |
| CD000307 | Schizophrenia                                        | B: Fluphenazine decanoate<br>C: Fluphenazine enanthate<br>A: Oral neuroleptic | Movement disorders general                      | 2 (49)<br>4 (303)<br>1 (31)                  | -2.464<br>(1.189) | PSS        | 2.36 | PCS        | 2.36 |
|          |                                                      |                                                                               |                                                 |                                              |                   | ISS        | 3.17 | ICS        | 3.54 |
|          |                                                      |                                                                               |                                                 |                                              |                   | OSS        | 2.50 | OCS        | 2.50 |
|          |                                                      |                                                                               |                                                 |                                              |                   | TSS        | 2.67 | TCS        | 2.80 |
|          |                                                      |                                                                               |                                                 |                                              |                   | QSS        | 3.89 |            |      |
| CD000320 | Scabies                                              | B: Permethrin<br>C: Lindane<br>A: Ivermectin                                  | Treatment failure in clinically diagnosed cases | 5 (753)<br>1 (85)<br>2 (193)                 | 2.640<br>(1.122)  | PSS        | 3.38 | PCS        | 3.46 |
|          |                                                      |                                                                               |                                                 |                                              |                   | ISS        | 4.80 | ICS        | 4.61 |
|          |                                                      |                                                                               |                                                 |                                              |                   | OSS        | 4.09 | OCS        | 4.09 |
|          |                                                      |                                                                               |                                                 |                                              |                   | TSS        | 4.09 | TCS        | 4.05 |
|          |                                                      |                                                                               |                                                 |                                              |                   | QSS        | 3.67 |            |      |

| CSR      | Clinical indications  | Treatment (B; C; A)                                                                     | Outcome measures                     | No.of trials (patients):<br>BvC, AvB, AvC | Delta (SE)        | TSA scores |      | ECA scores |      |
|----------|-----------------------|-----------------------------------------------------------------------------------------|--------------------------------------|-------------------------------------------|-------------------|------------|------|------------|------|
|          |                       |                                                                                         |                                      |                                           |                   |            |      |            |      |
| CD000402 | Post-menopausal women | B: Oestrogen + Progestagen (sequential)<br>C: Oestrogen<br>A: Placebo                   | Endometrial hyperplasia at 12 months | 4 (2117)<br>1 (49)<br>3 (1699)            | -1.229<br>(1.374) | PSS        | 3.63 | PCS        | 3.63 |
|          |                       |                                                                                         |                                      |                                           |                   | ISS        | 4.84 | ICS        | 3.75 |
|          |                       |                                                                                         |                                      |                                           |                   | OSS        | 5.00 | OCS        | 5.00 |
|          |                       |                                                                                         |                                      |                                           |                   | TSS        | 4.49 | TCS        | 4.13 |
|          |                       |                                                                                         |                                      |                                           |                   | QSS        | 2.62 |            |      |
| CD000527 | Severe malaria        | B: Arestunate<br>C: Artesmisinin<br>A: Quinine                                          | Mortality                            | 3 (253)<br>2 (231)<br>1 (65)              | 0.440<br>(1.015)  | PSS        | 2.46 | PCS        | 2.46 |
|          |                       |                                                                                         |                                      |                                           |                   | ISS        | 5.00 | ICS        | 4.21 |
|          |                       |                                                                                         |                                      |                                           |                   | OSS        | 4.00 | OCS        | 4.00 |
|          |                       |                                                                                         |                                      |                                           |                   | TSS        | 3.82 | TCS        | 3.56 |
|          |                       |                                                                                         |                                      |                                           |                   | QSS        | 4.82 |            |      |
| CD000978 | Oral mucositis        | B: GM-CSF<br>C: Scurlfate<br>A: Control                                                 | Mucositis (0-2 versus 3+)            | 1 (40)<br>6 (358)<br>6 (423)              | -0.497<br>(0.542) | PSS        | 3.32 | PCS        | 3.29 |
|          |                       |                                                                                         |                                      |                                           |                   | ISS        | 3.67 | ICS        | 2.95 |
|          |                       |                                                                                         |                                      |                                           |                   | OSS        | 3.13 | OCS        | 3.13 |
|          |                       |                                                                                         |                                      |                                           |                   | TSS        | 3.37 | TCS        | 3.12 |
|          |                       |                                                                                         |                                      |                                           |                   | QSS        | 4.55 |            |      |
| CD001103 | Venous leg ulcer      | B: Low adherent<br>C: Hydrocolloid dressing<br>A: Foam dressing                         | Total number of ulcers healed        | 8 (792)<br>2 (203)<br>4 (311)             | 0.194<br>(0.44)   | PSS        | 3.57 | PCS        | 3.53 |
|          |                       |                                                                                         |                                      |                                           |                   | ISS        | 4.15 | ICS        | 4.01 |
|          |                       |                                                                                         |                                      |                                           |                   | OSS        | 4.09 | OCS        | 4.09 |
|          |                       |                                                                                         |                                      |                                           |                   | TSS        | 3.93 | TCS        | 3.87 |
|          |                       |                                                                                         |                                      |                                           |                   | QSS        | 4.29 |            |      |
| CD001136 | Caesarean section     | B: 2nd/3rd generation cephalosporin<br>C: 1st generation cephalosporin<br>A: Ampicillin | Endometritis                         | 9 (2693)<br>1 (119)<br>1 (100)            | 0.694<br>(1.313)  | PSS        | 3.40 | PCS        | 3.40 |
|          |                       |                                                                                         |                                      |                                           |                   | ISS        | 3.17 | ICS        | 3.58 |
|          |                       |                                                                                         |                                      |                                           |                   | OSS        | 3.25 | OCS        | 3.25 |
|          |                       |                                                                                         |                                      |                                           |                   | TSS        | 3.27 | TCS        | 3.41 |
|          |                       |                                                                                         |                                      |                                           |                   | QSS        | 3.00 |            |      |
| CD001169 | Influenza A           | B: Rimanradine<br>C: Amantadine<br>A: Placeco                                           | Influenza cases                      | 2 (455)<br>1 (222)<br>9 (4194)            | 0.720<br>(1.03)   | PSS        | 2.94 | PCS        | 2.94 |
|          |                       |                                                                                         |                                      |                                           |                   | ISS        | 4.23 | ICS        | 3.88 |
|          |                       |                                                                                         |                                      |                                           |                   | OSS        | 3.50 | OCS        | 3.50 |
|          |                       |                                                                                         |                                      |                                           |                   | TSS        | 3.56 | TCS        | 3.44 |
|          |                       |                                                                                         |                                      |                                           |                   | QSS        | 2.90 |            |      |

| CSR      | Clinical indications                     | Treatment (B; C; A)                                                      | Outcome measures                       | No.of trials<br>(patients):<br>BvC, AvB, AvC | Delta<br>(SE)     | TSA scores |      | ECA scores |      |
|----------|------------------------------------------|--------------------------------------------------------------------------|----------------------------------------|----------------------------------------------|-------------------|------------|------|------------|------|
|          |                                          |                                                                          |                                        |                                              |                   |            |      |            |      |
| CD001209 | Urinary tract infection                  | B: Norfloxacin<br>C: Nitrofurantoin<br>A: Placebo                        | Microbiological recurrence             | 1 (52)<br>2 (59)<br>2 (69)                   | 1.936<br>(1.895)  | PSS        | 4.32 | PCS        | 3.67 |
|          |                                          |                                                                          |                                        |                                              |                   | ISS        | 4.96 | ICS        | 3.83 |
|          |                                          |                                                                          |                                        |                                              |                   | OSS        | 4.00 | OCS        | 3.92 |
|          |                                          |                                                                          |                                        |                                              |                   | TSS        | 4.43 | TCS        | 3.80 |
|          |                                          |                                                                          |                                        |                                              |                   | QSS        | 4.59 |            |      |
| CD001217 | thromboprophylaxis in colorectal surgery | B: LMW Heparin coverage<br>C: LD Heparin<br>A: Placebo or no treatment   | DVT                                    | 3 (1177)<br>1 (11)<br>3 (168)                | 0.904<br>(0.838)  | PSS        | 4.38 | PCS        | 3.64 |
|          |                                          |                                                                          |                                        |                                              |                   | ISS        | 5.00 | ICS        | 4.33 |
|          |                                          |                                                                          |                                        |                                              |                   | OSS        | 3.33 | OCS        | 3.33 |
|          |                                          |                                                                          |                                        |                                              |                   | TSS        | 4.24 | TCS        | 3.76 |
|          |                                          |                                                                          |                                        |                                              |                   | QSS        | 3.00 |            |      |
| CD001319 | Fluid resuscitation                      | B: Albumin/PPF<br>C: HES<br>A: Gelatine                                  | Death                                  | 13 (819)<br>1 (475)<br>11 (1024)             | -0.209<br>(0.34)  | PSS        | 2.75 | PCS        | 2.75 |
|          |                                          |                                                                          |                                        |                                              |                   | ISS        | 3.13 | ICS        | 2.97 |
|          |                                          |                                                                          |                                        |                                              |                   | OSS        | 3.79 | OCS        | 3.79 |
|          |                                          |                                                                          |                                        |                                              |                   | TSS        | 3.22 | TCS        | 3.17 |
|          |                                          |                                                                          |                                        |                                              |                   | QSS        | 4.37 |            |      |
| CD001324 | Unprotected intercourse                  | B: Mifepristone (25-50 mg)<br>C: Mifeprestone <25mg<br>A: Levonorgestrel | pregnancy                              | 18 (11242)<br>15 (3743)<br>8 (7916)          | -0.090<br>(0.324) | PSS        | 3.59 | PCS        | 3.46 |
|          |                                          |                                                                          |                                        |                                              |                   | ISS        | 5.00 | ICS        | 4.93 |
|          |                                          |                                                                          |                                        |                                              |                   | OSS        | 4.17 | OCS        | 4.17 |
|          |                                          |                                                                          |                                        |                                              |                   | TSS        | 4.25 | TCS        | 4.19 |
|          |                                          |                                                                          |                                        |                                              |                   | QSS        | 1.19 |            |      |
| CD001434 | Tinea pedis                              | B: Allylamines<br>C: Azoles<br>A: Placebo                                | short-term (2 weeks) treatment failure | 10 (1519)<br>9 (928)<br>5 (329)              | -0.475<br>(0.557) | PSS        | 2.92 | PCS        | 2.90 |
|          |                                          |                                                                          |                                        |                                              |                   | ISS        | 4.96 | ICS        | 4.21 |
|          |                                          |                                                                          |                                        |                                              |                   | OSS        | 4.04 | OCS        | 4.09 |
|          |                                          |                                                                          |                                        |                                              |                   | TSS        | 3.97 | TCS        | 3.73 |
|          |                                          |                                                                          |                                        |                                              |                   | QSS        | 4.61 |            |      |
| CD001449 | Hypertension during pregnancy            | B: Calcium channel blockers<br>C: Hyrazaline<br>A: Labetolol             | Persistent high BP                     | 3 (199)<br>1 (60)<br>1 (20)                  | -2.487<br>(1.164) | PSS        | 3.53 | PCS        | 3.23 |
|          |                                          |                                                                          |                                        |                                              |                   | ISS        | 3.08 | ICS        | 3.71 |
|          |                                          |                                                                          |                                        |                                              |                   | OSS        | 3.33 | OCS        | 3.33 |
|          |                                          |                                                                          |                                        |                                              |                   | TSS        | 3.31 | TCS        | 3.42 |
|          |                                          |                                                                          |                                        |                                              |                   | QSS        | 3.47 |            |      |

| CSR      | Clinical indications           | Treatment (B; C; A)                                                     | Outcome measures                                  | No.of trials (patients):<br>BvC, AvB, AvC | Delta (SE)        | TSA scores                      |                                      | ECA scores               |                              |
|----------|--------------------------------|-------------------------------------------------------------------------|---------------------------------------------------|-------------------------------------------|-------------------|---------------------------------|--------------------------------------|--------------------------|------------------------------|
|          |                                |                                                                         |                                                   |                                           |                   |                                 |                                      |                          |                              |
| CD001501 | Menorrhagia                    | B: Laser ablation<br>C: TCRE<br>A: Balloon ablation                     | Participant satisfaction at 12 mon                | 1 (321)<br>1 (57)<br>1 (75)               | -1.176<br>(1.397) | PSS<br>ISS<br>OSS<br>TSS<br>QSS | 4.17<br>5.00<br>4.17<br>4.45<br>4.00 | PCS<br>ICS<br>OCS<br>TCS | 4.11<br>5.00<br>4.17<br>4.43 |
| CD001535 | lower urinary tract infections | B: Long course<br>C: Short course<br>A: Single                          | Persistent UIT                                    | 3 (431)<br>3 (453)<br>5 (356)             | -0.686<br>(0.884) | PSS<br>ISS<br>OSS<br>TSS<br>QSS | 2.88<br>4.00<br>4.09<br>3.65<br>4.92 | PCS<br>ICS<br>OCS<br>TCS | 2.88<br>3.33<br>4.09<br>3.43 |
| CD001751 | Dysmenorrhea                   | B: Diclofenac<br>C: Nimesulide<br>A: Placebo                            | Subjective pain relief                            | 1 (304)<br>2 (80)<br>1 (37)               | -2.349<br>(1.019) | PSS<br>ISS<br>OSS<br>TSS<br>QSS | 3.96<br>4.92<br>2.34<br>3.74<br>4.50 | PCS<br>ICS<br>OCS<br>TCS | 3.52<br>4.54<br>2.34<br>3.46 |
| CD001781 | Cutaneous warts                | B: Cryotherapy<br>C: Salicylic + lactic acid<br>A: Placebo/no treatment | Cure rate                                         | 3 (320)<br>2 (69)<br>5 (322)              | -1.469<br>(0.767) | PSS<br>ISS<br>OSS<br>TSS<br>QSS | 3.33<br>4.21<br>4.04<br>3.86<br>3.77 | PCS<br>ICS<br>OCS<br>TCS | 3.33<br>3.50<br>4.00<br>3.61 |
| CD001782 | Photodamage skin               | B: Topical tretinoin 0.05%<br>C: Topical tretinoin 0.01%<br>A: Placebo  | Face overall improved - investigator's assessment | 2 (318)<br>1 (116)<br>1 (34)              | -2.323<br>(0.971) | PSS<br>ISS<br>OSS<br>TSS<br>QSS | 3.19<br>5.00<br>3.54<br>3.91<br>4.00 | PCS<br>ICS<br>OCS<br>TCS | 3.14<br>5.00<br>3.62<br>3.92 |
| CD001886 | Cardiac surgery                | B: Tranexamic acid<br>C: Aprotinin<br>A: Control                        | Mortality (cardia surgery subgroup)               | 5 (1401)<br>9 (1080)<br>28 (5820)         | -0.228<br>(0.582) | PSS<br>ISS<br>OSS<br>TSS<br>QSS | 4.13<br>3.79<br>3.42<br>3.78<br>3.47 | PCS<br>ICS<br>OCS<br>TCS | 3.63<br>3.75<br>3.25<br>3.54 |



| CSR      | Clinical indications | Treatment (B; C; A)                                                                                 | Outcome measures                                                         | No.of trials (patients):<br>BvC, AvB, AvC | Delta (SE)        | TSA scores                      |                                      | ECA scores               |                              |
|----------|----------------------|-----------------------------------------------------------------------------------------------------|--------------------------------------------------------------------------|-------------------------------------------|-------------------|---------------------------------|--------------------------------------|--------------------------|------------------------------|
|          |                      |                                                                                                     |                                                                          |                                           |                   |                                 |                                      |                          |                              |
| CD001896 | Dysmenorrhoea        | B: Laparoscopic presacral neurectomy<br>C: Laparoscopic uterine nerve ablation (LUNA)<br>A: Control | Pain relief up to 12 months                                              | 1 (68)<br>1 (126)<br>2 (68)               | -2.367<br>(0.947) | PSS<br>ISS<br>OSS<br>TSS<br>QSS | 3.54<br>4.38<br>4.13<br>4.02<br>4.62 | PCS<br>ICS<br>OCS<br>TCS | 3.34<br>4.05<br>4.13<br>3.84 |
| CD001951 | Schizophrenia        | B: Haloperidol 15-35mg/d<br>C: Haloperidol 7.5-15mg/d<br>A: Haloperidol >35mg/d                     | Leaving study early                                                      | 5 (208)<br>1 (128)<br>1 (48)              | 1.854<br>(1.613)  | PSS<br>ISS<br>OSS<br>TSS<br>QSS | 3.36<br>4.04<br>3.13<br>3.51<br>4.00 | PCS<br>ICS<br>OCS<br>TCS | 3.15<br>3.65<br>3.13<br>3.31 |
| CD001955 | Croup                | B: Budesonide<br>C: Dexamethasone<br>A: Placebo                                                     | Croup scores 6 hours<br>NB; Westley score                                | 4 (326)<br>3 (173)<br>2 (76)              | 2.909<br>(1.581)  | PSS<br>ISS<br>OSS<br>TSS<br>QSS | 3.58<br>5.00<br>4.83<br>4.47<br>4.33 | PCS<br>ICS<br>OCS<br>TCS | 3.36<br>3.59<br>4.75<br>3.90 |
| CD001960 | dyspepsia            | B: PPI<br>C: H2RA<br>A: Antacids                                                                    | Global symptom response                                                  | 2 (739)<br>9 (2749)<br>11 (1787)          | -0.507<br>(0.324) | PSS<br>ISS<br>OSS<br>TSS<br>QSS | 2.94<br>5.00<br>3.25<br>3.73<br>3.85 | PCS<br>ICS<br>OCS<br>TCS | 2.94<br>3.90<br>3.25<br>3.36 |
| CD001961 | Dyspepsia            | B: PPI<br>C: H2RA<br>A: Antacids                                                                    | Global assessment                                                        | 3 (1267)<br>3 (1615)<br>1 (255)           | -0.002<br>(0.364) | PSS<br>ISS<br>OSS<br>TSS<br>QSS | 2.27<br>3.44<br>1.96<br>2.56<br>1.00 | PCS<br>ICS<br>OCS<br>TCS | 2.27<br>3.20<br>1.96<br>2.48 |
| CD002060 | Neonatal jaundice    | B: Biliblanket<br>C: Wallaby<br>A: Conventional Phototherapy                                        | Change in serum bilirubin concentration over total period (% change /hr) | 1 (60)<br>8 (513)<br>3 (164)              | 0.261<br>(0.275)  | PSS<br>ISS<br>OSS<br>TSS<br>QSS | 3.60<br>3.34<br>4.17<br>3.70<br>4.82 | PCS<br>ICS<br>OCS<br>TCS | 2.85<br>3.32<br>4.17<br>3.45 |

| CSR      | Clinical indications                 | Treatment (B; C; A)                                                         | Outcome measures                              | No.of trials<br>(patients):<br>BvC, AvB, AvC | Delta<br>(SE)     | TSA scores |      | ECA scores |      |
|----------|--------------------------------------|-----------------------------------------------------------------------------|-----------------------------------------------|----------------------------------------------|-------------------|------------|------|------------|------|
|          |                                      |                                                                             |                                               |                                              |                   |            |      |            |      |
| CD002095 | Reflux dis -positive endoscopy       | B: PPI<br>C: H2RA<br>A: Antacids                                            | Heartburn remission                           | 7 (3147)<br>2 (760)<br>2 (1013)              | 0.570<br>(0.27)   | PSS        | 3.69 | PCS        | 3.53 |
|          |                                      |                                                                             |                                               |                                              |                   | ISS        | 5.00 | ICS        | 4.54 |
|          |                                      |                                                                             |                                               |                                              |                   | OSS        | 3.17 | OCS        | 3.17 |
|          |                                      |                                                                             |                                               |                                              |                   | TSS        | 3.95 | TCS        | 3.74 |
|          |                                      |                                                                             |                                               |                                              |                   | QSS        | 4.90 |            |      |
| CD002123 | dysmenorrhoea                        | B: High frequency TENS<br>C: Low frequency TENS<br>A: Placebo TENS          | Pain relief – overall experience              | 1 (42)<br>1 (64)<br>1 (8)                    | 2.275<br>(2.103)  | PSS        | 3.71 | PCS        | 3.71 |
|          |                                      |                                                                             |                                               |                                              |                   | ISS        | 3.83 | ICS        | 3.97 |
|          |                                      |                                                                             |                                               |                                              |                   | OSS        | 4.17 | OCS        | 3.33 |
|          |                                      |                                                                             |                                               |                                              |                   | TSS        | 3.90 | TCS        | 3.67 |
|          |                                      |                                                                             |                                               |                                              |                   | QSS        | 2.00 |            |      |
| CD002251 | Hypotension during caesarean section | B: Ephedrine<br>C: Crystalloid<br>A: Control                                | Women with hypotension requiring intervention | 4 (293)<br>6 (350)<br>1 (140)                | -0.103<br>(0.692) | PSS        | 3.69 | PCS        | 3.69 |
|          |                                      |                                                                             |                                               |                                              |                   | ISS        | 3.75 | ICS        | 3.83 |
|          |                                      |                                                                             |                                               |                                              |                   | OSS        | 3.33 | OCS        | 3.33 |
|          |                                      |                                                                             |                                               |                                              |                   | TSS        | 3.59 | TCS        | 3.62 |
|          |                                      |                                                                             |                                               |                                              |                   | QSS        | 4.52 |            |      |
| CD002252 | Hypertension during pregnancy        | B: Beta-blocker<br>C: Methyldopa<br>A: Control (none)                       | Proteinuria/pre-eclampsia                     | 9 (804)<br>8 (883)<br>2 (267)                | 0.483<br>(0.558)  | PSS        | 3.30 | PCS        | 3.30 |
|          |                                      |                                                                             |                                               |                                              |                   | ISS        | 3.84 | ICS        | 3.23 |
|          |                                      |                                                                             |                                               |                                              |                   | OSS        | 3.00 | OCS        | 3.00 |
|          |                                      |                                                                             |                                               |                                              |                   | TSS        | 3.38 | TCS        | 3.18 |
|          |                                      |                                                                             |                                               |                                              |                   | QSS        | 3.72 |            |      |
| CD002296 | gastroduodenal ulcers                | B: Proton-pump inhibitor<br>C: H2-receptor antagonists (H2RA)<br>A: Placebo | Total endoscopic ulcers                       | 1 (425)<br>5 (1216)<br>5 (1186)              | -0.715<br>(0.406) | PSS        | 3.69 | PCS        | 3.67 |
|          |                                      |                                                                             |                                               |                                              |                   | ISS        | 4.67 | ICS        | 4.04 |
|          |                                      |                                                                             |                                               |                                              |                   | OSS        | 4.00 | OCS        | 4.00 |
|          |                                      |                                                                             |                                               |                                              |                   | TSS        | 4.12 | TCS        | 3.90 |
|          |                                      |                                                                             |                                               |                                              |                   | QSS        | 4.33 |            |      |
| CD002780 | Dental Caries                        | B: Fluoride toothpaste<br>C: Fluoride mouthrinse<br>A: Fluoride varnish     | Leaving study early                           | 5 (2752)<br>1 (193)<br>2 (626)               | -0.180<br>(0.674) | PSS        | 3.40 | PCS        | 3.40 |
|          |                                      |                                                                             |                                               |                                              |                   | ISS        | 4.54 | ICS        | 3.93 |
|          |                                      |                                                                             |                                               |                                              |                   | OSS        | 3.63 | OCS        | 3.63 |
|          |                                      |                                                                             |                                               |                                              |                   | TSS        | 3.86 | TCS        | 3.65 |
|          |                                      |                                                                             |                                               |                                              |                   | QSS        | 5.00 |            |      |

| CSR      | Clinical indications                         | Treatment (B; C; A)                                                            | Outcome measures                                | No.of trials<br>(patients):<br>BvC, AvB, AvC | Delta<br>(SE)     | TSA scores |      | ECA scores |      |
|----------|----------------------------------------------|--------------------------------------------------------------------------------|-------------------------------------------------|----------------------------------------------|-------------------|------------|------|------------|------|
|          |                                              |                                                                                |                                                 |                                              |                   |            |      |            |      |
| CD002898 | herpes simplex virus<br>epithelial keratitis | B: Acyclovir<br>C: Idoxuridine<br>A: Trifluridine                              | Healing at 14 days                              | 11 (600)<br>3 (140)<br>4 (219)               | -0.063<br>(0.80)  | PSS        | 3.71 | PCS        | 3.29 |
|          |                                              |                                                                                |                                                 |                                              |                   | ISS        | 4.17 | ICS        | 3.90 |
|          |                                              |                                                                                |                                                 |                                              |                   | OSS        | 3.33 | OCS        | 3.33 |
|          |                                              |                                                                                |                                                 |                                              |                   | TSS        | 3.74 | TCS        | 3.51 |
|          |                                              |                                                                                |                                                 |                                              |                   | QSS        | 5.00 |            |      |
| CD002916 | Malignant pleural<br>effusion                | B: Talc<br>C: Tetracycline<br>A: Control                                       | No recurrence of<br>effusions                   | 3 (103)<br>2 (82)<br>2 (51)                  | -2.490<br>(2.678) | PSS        | 2.92 | PCS        | 2.92 |
|          |                                              |                                                                                |                                                 |                                              |                   | ISS        | 4.21 | ICS        | 3.36 |
|          |                                              |                                                                                |                                                 |                                              |                   | OSS        | 3.33 | OCS        | 3.33 |
|          |                                              |                                                                                |                                                 |                                              |                   | TSS        | 3.49 | TCS        | 3.20 |
|          |                                              |                                                                                |                                                 |                                              |                   | QSS        | 4.23 |            |      |
| CD003101 | Induction of labour                          | B: Prostaglandin E2<br>C: Prostaglandin F2a (PGF2a)<br>A: Placebo/no treatment | Caesarean section                               | 2 (107)<br>31 (6211)<br>2 (355)              | -0.400<br>(0.634) | PSS        | 3.63 | PCS        | 3.63 |
|          |                                              |                                                                                |                                                 |                                              |                   | ISS        | 3.27 | ICS        | 3.65 |
|          |                                              |                                                                                |                                                 |                                              |                   | OSS        | 4.17 | OCS        | 4.17 |
|          |                                              |                                                                                |                                                 |                                              |                   | TSS        | 3.69 | TCS        | 3.81 |
|          |                                              |                                                                                |                                                 |                                              |                   | QSS        | 4.50 |            |      |
| CD003167 | glaucoma and ocular<br>hypertension          | B: Betaxolol<br>C: Timolol<br>A: Placebo                                       | Drop-out due to drug-<br>related adverse events | 3 (195)<br>1 (356)<br>2 (127)                | -0.023<br>(0.939) | PSS        | 3.81 | PCS        | 3.71 |
|          |                                              |                                                                                |                                                 |                                              |                   | ISS        | 4.96 | ICS        | 4.61 |
|          |                                              |                                                                                |                                                 |                                              |                   | OSS        | 4.04 | OCS        | 4.04 |
|          |                                              |                                                                                |                                                 |                                              |                   | TSS        | 4.27 | TCS        | 4.12 |
|          |                                              |                                                                                |                                                 |                                              |                   | QSS        | 4.71 |            |      |
| CD003187 | Hodgkin's disease-early<br>stage             | B: Radiotherapy<br>C: Chemotherapy<br>A: Combined chemo-<br>radiotherapy       | Overall survival                                | 2 (299)<br>11 (2744)<br>3 (495)              | 0.124<br>(0.417)  | PSS        | 2.67 | PCS        | 2.63 |
|          |                                              |                                                                                |                                                 |                                              |                   | ISS        | 3.36 | ICS        | 3.07 |
|          |                                              |                                                                                |                                                 |                                              |                   | OSS        | 3.92 | OCS        | 4.00 |
|          |                                              |                                                                                |                                                 |                                              |                   | TSS        | 3.31 | TCS        | 3.23 |
|          |                                              |                                                                                |                                                 |                                              |                   | QSS        | 3.68 |            |      |
| CD003209 | Distal radial fractures                      | B: Percutaneous pinning;<br>C: External fixation<br>A: Plaster cast            | Functional grading -<br>not excellent           | 2 (99)<br>4 (233)<br>8 (489)                 | -0.902<br>(0.986) | PSS        | 4.03 | PCS        | 3.53 |
|          |                                              |                                                                                |                                                 |                                              |                   | ISS        | 5.00 | ICS        | 4.71 |
|          |                                              |                                                                                |                                                 |                                              |                   | OSS        | 3.17 | OCS        | 3.17 |
|          |                                              |                                                                                |                                                 |                                              |                   | TSS        | 4.07 | TCS        | 3.80 |
|          |                                              |                                                                                |                                                 |                                              |                   | QSS        | 4.97 |            |      |

| CSR      | Clinical indications   | Treatment (B; C; A)                                               | Outcome measures                                     | No.of trials<br>(patients):<br>BvC, AvB, AvC | Delta<br>(SE)     | TSA scores |      | ECA scores |      |
|----------|------------------------|-------------------------------------------------------------------|------------------------------------------------------|----------------------------------------------|-------------------|------------|------|------------|------|
|          |                        |                                                                   |                                                      |                                              |                   |            |      |            |      |
| CD003226 | migraine               | B: Topiramate 200mg<br>C: Topiramate 100mg<br>A: Placebo          | 50% or greater<br>reduction in migraine<br>frequency | 3 (756)<br>1 (72)<br>2 (70)                  | 0.154<br>(0.838)  | PSS        | 3.38 | PCS        | 3.13 |
|          |                        |                                                                   |                                                      |                                              |                   | ISS        | 5.00 | ICS        | 4.64 |
|          |                        |                                                                   |                                                      |                                              |                   | OSS        | 2.59 | OCS        | 2.59 |
|          |                        |                                                                   |                                                      |                                              |                   | TSS        | 3.65 | TCS        | 3.45 |
|          |                        |                                                                   |                                                      |                                              |                   | QSS        | 3.43 |            |      |
| CD003245 | reflux disease         | B: PPI<br>C: H2 RA<br>A: Placebo                                  | Relapse (oesophagitis)                               | 10 (1583)<br>9 (1385)<br>4 (655)             | 0.143<br>(0.517)  | PSS        | 3.67 | PCS        | 3.61 |
|          |                        |                                                                   |                                                      |                                              |                   | ISS        | 4.84 | ICS        | 4.36 |
|          |                        |                                                                   |                                                      |                                              |                   | OSS        | 4.50 | OCS        | 4.05 |
|          |                        |                                                                   |                                                      |                                              |                   | TSS        | 4.33 | TCS        | 4.00 |
|          |                        |                                                                   |                                                      |                                              |                   | QSS        | 4.99 |            |      |
| CD003261 | Impetigo               | B: Mupirocin<br>C: Fusidic acid<br>A: Placebo                     | Cure/improvement                                     | 4 (440)<br>3 (173)<br>1 (156)                | -0.687<br>(0.592) | PSS        | 2.17 | PCS        | 2.11 |
|          |                        |                                                                   |                                                      |                                              |                   | ISS        | 3.96 | ICS        | 3.52 |
|          |                        |                                                                   |                                                      |                                              |                   | OSS        | 3.21 | OCS        | 3.21 |
|          |                        |                                                                   |                                                      |                                              |                   | TSS        | 3.11 | TCS        | 2.94 |
|          |                        |                                                                   |                                                      |                                              |                   | QSS        | 2.23 |            |      |
| CD003262 | rosacea                | B: Topical azelaic acid<br>C: Topical metronidazole<br>A; Placebo | Physician's global<br>evaluation of<br>improvement   | 1 (251)<br>3 (778)<br>3 (313)                | -1.590<br>(0.449) | PSS        | 3.67 | PCS        | 3.67 |
|          |                        |                                                                   |                                                      |                                              |                   | ISS        | 4.71 | ICS        | 4.05 |
|          |                        |                                                                   |                                                      |                                              |                   | OSS        | 3.17 | OCS        | 3.17 |
|          |                        |                                                                   |                                                      |                                              |                   | TSS        | 3.85 | TCS        | 3.63 |
|          |                        |                                                                   |                                                      |                                              |                   | QSS        | 4.41 |            |      |
| CD003352 | cocaine dependence     | B: Amantadine<br>C: Bromocriptine<br>A: Placebo                   | Positive urine sample<br>for cocaine metabolites     | 1 (14)<br>1 (30)<br>1 (29)                   | 0.010<br>(1.696)  | PSS        | 3.25 | PCS        | 2.96 |
|          |                        |                                                                   |                                                      |                                              |                   | ISS        | 4.92 | ICS        | 4.22 |
|          |                        |                                                                   |                                                      |                                              |                   | OSS        | 4.09 | OCS        | 4.09 |
|          |                        |                                                                   |                                                      |                                              |                   | TSS        | 4.08 | TCS        | 3.75 |
|          |                        |                                                                   |                                                      |                                              |                   | QSS        | 5.00 |            |      |
| CD003370 | Advanced breast cancer | B: Aminoglutethimide<br>C: Letrozole<br>A: non-AI                 | No clinical benefit<br>(assessable)                  | 1 (335)<br>4 (1637)<br>5 (637)               | -0.434<br>(0.309) | PSS        | 3.13 | PCS        | 3.17 |
|          |                        |                                                                   |                                                      |                                              |                   | ISS        | 3.38 | ICS        | 3.20 |
|          |                        |                                                                   |                                                      |                                              |                   | OSS        | 3.67 | OCS        | 3.67 |
|          |                        |                                                                   |                                                      |                                              |                   | TSS        | 3.39 | TCS        | 3.34 |
|          |                        |                                                                   |                                                      |                                              |                   | QSS        | 3.08 |            |      |

| CSR      | Clinical indications              | Treatment (B; C; A)                                                            | Outcome measures                  | No.of trials<br>(patients):<br>BvC, AvB, AvC | Delta<br>(SE)     | TSA scores |      | ECA scores |      |
|----------|-----------------------------------|--------------------------------------------------------------------------------|-----------------------------------|----------------------------------------------|-------------------|------------|------|------------|------|
|          |                                   |                                                                                |                                   |                                              |                   |            |      |            |      |
| CD003385 | Bulimia Nervosa                   | B: Antidepressant +<br>Cpsychotherapy<br>A: Antidepressant<br>C: Psychotherapy | Remission                         | 4 (141)<br>2 (107)<br>1 (88)                 | -1.156<br>(0.747) | PSS        | 3.59 | PCS        | 3.25 |
|          |                                   |                                                                                |                                   |                                              |                   | ISS        | 1.29 | ICS        | 1.35 |
|          |                                   |                                                                                |                                   |                                              |                   | OSS        | 3.25 | OCS        | 3.25 |
|          |                                   |                                                                                |                                   |                                              |                   | TSS        | 2.71 | TCS        | 2.62 |
|          |                                   |                                                                                |                                   |                                              |                   | QSS        | 4.88 |            |      |
| CD003388 | Post traumatic stress<br>disorder | B: EMDR<br>C: TFCBT<br>A: Waiting list/usual care                              | PTSD diagnosis after<br>treatment | 7 (260)<br>3 (72)<br>12 (620)                | 0.198<br>(1.38)   | PSS        | 2.90 | PCS        | 2.82 |
|          |                                   |                                                                                |                                   |                                              |                   | ISS        | 2.84 | ICS        | 2.66 |
|          |                                   |                                                                                |                                   |                                              |                   | OSS        | 3.06 | OCS        | 3.06 |
|          |                                   |                                                                                |                                   |                                              |                   | TSS        | 2.93 | TCS        | 2.85 |
|          |                                   |                                                                                |                                   |                                              |                   | QSS        | 4.37 |            |      |
| CD003431 | Anal fissure                      | B: Botox<br>C: Nitroglycerin ointment<br>(TN)<br>A: Placebo                    | Non-healing                       | 4 (187)<br>3 (136)<br>15 (1190)              | -0.503<br>(1.363) | PSS        | 3.08 | PCS        | 2.83 |
|          |                                   |                                                                                |                                   |                                              |                   | ISS        | 4.46 | ICS        | 3.50 |
|          |                                   |                                                                                |                                   |                                              |                   | OSS        | 3.92 | OCS        | 3.92 |
|          |                                   |                                                                                |                                   |                                              |                   | TSS        | 3.82 | TCS        | 3.42 |
|          |                                   |                                                                                |                                   |                                              |                   | QSS        | 3.68 |            |      |
| CD003534 | Chronic asthma                    | B: FP 400-500 mcg/d<br>C: FP 100 mcg/d<br>A: FP 200 mcg/d                      | Change in FEV1 (L)                | 4 (511)<br>8 (1226)<br>3 (404)               | -0.222<br>(0.147) | PSS        | 3.34 | PCS        | 3.34 |
|          |                                   |                                                                                |                                   |                                              |                   | ISS        | 3.52 | ICS        | 3.04 |
|          |                                   |                                                                                |                                   |                                              |                   | OSS        | 3.80 | OCS        | 3.80 |
|          |                                   |                                                                                |                                   |                                              |                   | TSS        | 3.55 | TCS        | 3.39 |
|          |                                   |                                                                                |                                   |                                              |                   | QSS        | 4.63 |            |      |
| CD003584 | Tinea pedis                       | B: Terbinafine<br>C: Itraconazole<br>A: Placebo                                | Cure (week 8)                     | 3 (295)<br>1 (41)<br>1 (48)                  | 0.446<br>(1.842)  | PSS        | 4.13 | PCS        | 3.34 |
|          |                                   |                                                                                |                                   |                                              |                   | ISS        | 4.83 | ICS        | 3.97 |
|          |                                   |                                                                                |                                   |                                              |                   | OSS        | 5.00 | OCS        | 5.00 |
|          |                                   |                                                                                |                                   |                                              |                   | TSS        | 4.65 | TCS        | 4.10 |
|          |                                   |                                                                                |                                   |                                              |                   | QSS        | 4.00 |            |      |
| CD003592 | anxiety disorder                  | B: Paroxetine<br>C: Imipramine<br>A: Placebo                                   | No treatment response             | 1 (56)<br>1 (324)<br>1 (113)                 | -0.980<br>(0.987) | PSS        | 3.82 | PCS        | 3.77 |
|          |                                   |                                                                                |                                   |                                              |                   | ISS        | 4.86 | ICS        | 4.38 |
|          |                                   |                                                                                |                                   |                                              |                   | OSS        | 5.00 | OCS        | 5.00 |
|          |                                   |                                                                                |                                   |                                              |                   | TSS        | 4.56 | TCS        | 4.38 |
|          |                                   |                                                                                |                                   |                                              |                   | QSS        | 4.00 |            |      |

| CSR      | Clinical indications                    | Treatment (B; C; A)                                                                                 | Outcome measures               | No.of trials (patients):<br>BvC, AvB, AvC | Delta (SE)        | TSA scores |      | ECA scores |      |
|----------|-----------------------------------------|-----------------------------------------------------------------------------------------------------|--------------------------------|-------------------------------------------|-------------------|------------|------|------------|------|
|          |                                         |                                                                                                     |                                |                                           |                   |            |      |            |      |
| CD003664 | allergy and food intolerance in infants | B: Extensively hydrolysed formula<br>C: Cow's milk formula<br>A: Partially hydrolysed formula       | Any allergy                    | 2 (1561)<br>1 (246)<br>5 (425)            | 0.726<br>(0.387)  | PSS        | 3.44 | PCS        | 3.44 |
|          |                                         |                                                                                                     |                                |                                           |                   | ISS        | 4.35 | ICS        | 4.17 |
|          |                                         |                                                                                                     |                                |                                           |                   | OSS        | 3.92 | OCS        | 3.92 |
|          |                                         |                                                                                                     |                                |                                           |                   | TSS        | 3.90 | TCS        | 3.84 |
|          |                                         |                                                                                                     |                                |                                           |                   | QSS        | 3.29 |            |      |
| CD003677 | hysterectomy                            | B: Laparoscopic hysterectomy (LH)<br>C: Abdominal hysterectomy (AH)<br>A: Vaginal hysterectomy (VH) | Length of hospital stay (days) | 9 (948)<br>2 (157)<br>2 (155)             | -1.846<br>(0.603) | PSS        | 4.45 | PCS        | 4.43 |
|          |                                         |                                                                                                     |                                |                                           |                   | ISS        | 4.13 | ICS        | 3.86 |
|          |                                         |                                                                                                     |                                |                                           |                   | OSS        | 4.09 | OCS        | 4.09 |
|          |                                         |                                                                                                     |                                |                                           |                   | TSS        | 4.22 | TCS        | 4.12 |
|          |                                         |                                                                                                     |                                |                                           |                   | QSS        | 4.07 |            |      |
| CD003723 | status epilepticus                      | B: Lorazepam<br>C: Diazepam<br>A: Midazolam                                                         | Non-cessation of seizures      | 3 (264)<br>1 (27)<br>1 (40)               | -2.644<br>(1.399) | PSS        | 2.73 | PCS        | 2.61 |
|          |                                         |                                                                                                     |                                |                                           |                   | ISS        | 3.63 | ICS        | 2.97 |
|          |                                         |                                                                                                     |                                |                                           |                   | OSS        | 4.09 | OCS        | 4.09 |
|          |                                         |                                                                                                     |                                |                                           |                   | TSS        | 3.48 | TCS        | 3.22 |
|          |                                         |                                                                                                     |                                |                                           |                   | QSS        | 3.00 |            |      |
| CD003738 | cataract                                | B: PMMA (polymethyl methacrylate)<br>C: Silicone<br>A: Acrylic                                      | YAG rate                       | 4 (244)<br>2 (229)<br>5 (334)             | -1.947<br>(1.046) | PSS        | 4.50 | PCS        | 4.50 |
|          |                                         |                                                                                                     |                                |                                           |                   | ISS        | 4.26 | ICS        | 4.10 |
|          |                                         |                                                                                                     |                                |                                           |                   | OSS        | 4.25 | OCS        | 3.75 |
|          |                                         |                                                                                                     |                                |                                           |                   | TSS        | 4.34 | TCS        | 4.12 |
|          |                                         |                                                                                                     |                                |                                           |                   | QSS        | 4.10 |            |      |
| CD003774 | solid organ transplant recipients       | B: Ganciclovir<br>C: Aciclovir<br>A: Placebo                                                        | CMV organ involvement          | 7 (1034)<br>7 (769)<br>3 (216)            | -0.866<br>(0.674) | PSS        | 4.19 | PCS        | 4.13 |
|          |                                         |                                                                                                     |                                |                                           |                   | ISS        | 3.42 | ICS        | 3.41 |
|          |                                         |                                                                                                     |                                |                                           |                   | OSS        | 3.75 | OCS        | 3.75 |
|          |                                         |                                                                                                     |                                |                                           |                   | TSS        | 3.79 | TCS        | 3.76 |
|          |                                         |                                                                                                     |                                |                                           |                   | QSS        | 4.88 |            |      |
| CD003807 | oral candidiasis in cancer patients     | B: Drugs absorbed from GI tract<br>C: Drugs not absorbed from GI<br>A: Placebo or no treatment.     | Oral candidiasis present       | 8 (2103)<br>6 (1123)<br>7 (362)           | -0.992<br>(0.642) | PSS        | 3.27 | PCS        | 3.27 |
|          |                                         |                                                                                                     |                                |                                           |                   | ISS        | 3.67 | ICS        | 3.47 |
|          |                                         |                                                                                                     |                                |                                           |                   | OSS        | 3.25 | OCS        | 3.25 |
|          |                                         |                                                                                                     |                                |                                           |                   | TSS        | 3.40 | TCS        | 3.33 |
|          |                                         |                                                                                                     |                                |                                           |                   | QSS        | 3.78 |            |      |

| CSR      | Clinical indications              | Treatment (B; C; A)                                                                                                   | Outcome measures                                          | No.of trials (patients):<br>BvC, AvB, AvC | Delta (SE)         | TSA scores |      | ECA scores |      |
|----------|-----------------------------------|-----------------------------------------------------------------------------------------------------------------------|-----------------------------------------------------------|-------------------------------------------|--------------------|------------|------|------------|------|
|          |                                   |                                                                                                                       |                                                           |                                           |                    |            |      |            |      |
| CD003827 | central venous catheters required | B: Gauze & tape<br>C: Highly Perm TP<br>A: Transparent PU dressing                                                    | Catheter related sepsis                                   | 2 (115)<br>1 (98)<br>1 (101)              | 0.077<br>(2.556)   | PSS        | 3.33 | PCS        | 3.33 |
|          |                                   |                                                                                                                       |                                                           |                                           |                    | ISS        | 4.09 | ICS        | 3.47 |
|          |                                   |                                                                                                                       |                                                           |                                           |                    | OSS        | 4.17 | OCS        | 4.17 |
|          |                                   |                                                                                                                       |                                                           |                                           |                    | TSS        | 3.86 | TCS        | 3.66 |
|          |                                   |                                                                                                                       |                                                           |                                           |                    | QSS        | 4.88 |            |      |
| CD003842 | Axillary brachial plexus block    | B: Multiple injection<br>C: Double injection<br>A: Single injection                                                   | Primary anaesthesia failure                               | 4 (270)<br>1 (80)<br>1 (50)               | -2.324<br>(1.088)  | PSS        | 4.25 | PCS        | 4.25 |
|          |                                   |                                                                                                                       |                                                           |                                           |                    | ISS        | 4.00 | ICS        | 3.75 |
|          |                                   |                                                                                                                       |                                                           |                                           |                    | OSS        | 4.00 | OCS        | 4.00 |
|          |                                   |                                                                                                                       |                                                           |                                           |                    | TSS        | 4.08 | TCS        | 4.00 |
|          |                                   |                                                                                                                       |                                                           |                                           |                    | QSS        | 5.00 |            |      |
| CD003878 | Missing teeth                     | B: Immediate loading of osseo-integrated implants<br>C: Early loading of osseo-integrated implants<br>A: Conventional | Patients with implant failures                            | 5 (468)<br>8 (310)<br>2 (72)              | -0.950<br>(1.651)  | PSS        | 2.75 | PCS        | 2.79 |
|          |                                   |                                                                                                                       |                                                           |                                           |                    | ISS        | 2.90 | ICS        | 2.67 |
|          |                                   |                                                                                                                       |                                                           |                                           |                    | OSS        | 3.84 | OCS        | 3.84 |
|          |                                   |                                                                                                                       |                                                           |                                           |                    | TSS        | 3.16 | TCS        | 3.10 |
|          |                                   |                                                                                                                       |                                                           |                                           |                    | QSS        | 4.38 |            |      |
| CD003940 | Oropharyngeal candidiasis         | B: Fluconazole<br>C: Clotrimozale<br>A: Itraconazole                                                                  | Mycological cure                                          | 2 (358);<br>3 (400);<br>1 (123)           | 0.929<br>(0.613)   | PSS        | 3.36 | PCS        | 3.32 |
|          |                                   |                                                                                                                       |                                                           |                                           |                    | ISS        | 4.09 | ICS        | 3.70 |
|          |                                   |                                                                                                                       |                                                           |                                           |                    | OSS        | 2.30 | OCS        | 2.30 |
|          |                                   |                                                                                                                       |                                                           |                                           |                    | TSS        | 3.25 | TCS        | 3.10 |
|          |                                   |                                                                                                                       |                                                           |                                           |                    | QSS        | 3.60 |            |      |
| CD004109 | asthma                            | B: High dose ICS<br>C: Low dose ICS<br>A: Moderate ICS                                                                | Morning PEF                                               | 2 (282);<br>3 (834);<br>4 (300)           | -5.020<br>(12.62)  | PSS        | 3.48 | PCS        | 3.06 |
|          |                                   |                                                                                                                       |                                                           |                                           |                    | ISS        | 3.40 | ICS        | 3.29 |
|          |                                   |                                                                                                                       |                                                           |                                           |                    | OSS        | 4.09 | OCS        | 4.09 |
|          |                                   |                                                                                                                       |                                                           |                                           |                    | TSS        | 3.65 | TCS        | 3.48 |
|          |                                   |                                                                                                                       |                                                           |                                           |                    | QSS        | 4.55 |            |      |
| CD004217 | Neonatal circumcision             | B; Eutectic mixture of analgesics (EMLA)<br>C: Dorsal penile nerve block (DPNB)<br>A: No treatment/sham               | Heart rate -bpm change from baseline (or bmp at endpoint) | 1 (29);<br>4 (117);<br>5 (245)            | 19.680<br>(10.769) | PSS        | 4.03 | PCS        | 4.03 |
|          |                                   |                                                                                                                       |                                                           |                                           |                    | ISS        | 3.83 | ICS        | 3.97 |
|          |                                   |                                                                                                                       |                                                           |                                           |                    | OSS        | 4.09 | OCS        | 4.09 |
|          |                                   |                                                                                                                       |                                                           |                                           |                    | TSS        | 3.98 | TCS        | 4.03 |
|          |                                   |                                                                                                                       |                                                           |                                           |                    | QSS        | 4.44 |            |      |

| CSR             | Clinical indications                                 | Treatment (B; C; A)                                                                            | Outcome measures             | No.of trials (patients):<br>BvC, AvB, AvC | Delta (SE)        | TSA scores                      |                                      | ECA scores               |                              |
|-----------------|------------------------------------------------------|------------------------------------------------------------------------------------------------|------------------------------|-------------------------------------------|-------------------|---------------------------------|--------------------------------------|--------------------------|------------------------------|
|                 |                                                      |                                                                                                |                              |                                           |                   |                                 |                                      |                          |                              |
| <b>CD004291</b> | organ transplant                                     | B: Fluconazole<br>C: Itraconazole<br>A: Control                                                | Mortality                    | 1 (188);<br>4 (477);<br>2 (191)           | -1.046<br>(0.826) | PSS<br>ISS<br>OSS<br>TSS<br>QSS | 4.38<br>3.04<br>4.17<br>3.86<br>4.24 | PCS<br>ICS<br>OCS<br>TCS | 4.38<br>3.29<br>4.09<br>3.92 |
| <b>CD004293</b> | nephropathy                                          | B: Alkylating agents<br>C: Steroids<br>A: Placebo/no treatment                                 | ESRF/Death                   | 3 (189);<br>3 (174);<br>3 (333)           | 0.026<br>(0.886)  | PSS<br>ISS<br>OSS<br>TSS<br>QSS | 3.90<br>3.79<br>4.67<br>4.12<br>3.38 | PCS<br>ICS<br>OCS<br>TCS | 3.88<br>3.77<br>4.00<br>3.88 |
| <b>CD004379</b> | poor responders to ovarian hyperstimulation          | B: GnRH antagonist<br>C: GnRH Flare up protocol<br>A: Conventional GnRH $\alpha$ long protocol | Pregnancy                    | 2 (93);<br>1 (60);<br>1 (54)              | -2.468<br>(1.257) | PSS<br>ISS<br>OSS<br>TSS<br>QSS | 3.48<br>2.55<br>2.84<br>2.95<br>5.00 | PCS<br>ICS<br>OCS<br>TCS | 3.48<br>2.36<br>2.84<br>2.89 |
| <b>CD004386</b> | afebrile neutropenic patients following chemotherapy | B: Quinolones<br>C: TMP-SMZ (trimethoprim-sulfamethoxole)<br>A: Placebo or no treatment        | All cause mortality          | 10 (917);<br>14 (870);<br>14 (3439)       | 0.247<br>(0.439)  | PSS<br>ISS<br>OSS<br>TSS<br>QSS | 3.03<br>4.21<br>4.08<br>3.77<br>2.95 | PCS<br>ICS<br>OCS<br>TCS | 3.03<br>3.18<br>4.08<br>3.43 |
| <b>CD004423</b> | Perioperative complications                          | B: High volume fluid<br>C: Low volume<br>A: Standard fast                                      | Gastric contents (volume ml) | 1 (50);<br>2 (245);<br>8 (522)            | -5.408<br>(7.622) | PSS<br>ISS<br>OSS<br>TSS<br>QSS | 3.08<br>5.00<br>5.00<br>4.36<br>4.27 | PCS<br>ICS<br>OCS<br>TCS | 3.00<br>4.47<br>5.00<br>4.16 |
| <b>CD004610</b> | diarrhoea                                            | B: Teicoplanin<br>C: Metronidazole<br>A: Vancomycin                                            | Symptomatic Initial Response | 1 (59);<br>1 (40);<br>1 (101)             | -0.798<br>(1.492) | PSS<br>ISS<br>OSS<br>TSS<br>QSS | 3.33<br>5.00<br>4.92<br>4.42<br>4.00 | PCS<br>ICS<br>OCS<br>TCS | 3.33<br>4.18<br>4.92<br>4.14 |



| CSR             | Clinical indications                                    | Treatment (B; C; A)                                                       | Outcome measures                             | No.of trials (patients):<br>BvC, AvB, AvC | Delta (SE)        | TSA scores                      |                                      | ECA scores               |                              |
|-----------------|---------------------------------------------------------|---------------------------------------------------------------------------|----------------------------------------------|-------------------------------------------|-------------------|---------------------------------|--------------------------------------|--------------------------|------------------------------|
|                 |                                                         |                                                                           |                                              |                                           |                   |                                 |                                      |                          |                              |
| <b>CD004618</b> | Chronic suppurative otitis media                        | B: Topical quinolone<br>C: Topical non-quinolone<br>A: Topical antiseptic | Discharge at 2-4 weeks                       | 6 (314);<br>2 (430);<br>2 (140)           | 0.641<br>(0.629)  | PSS<br>ISS<br>OSS<br>TSS<br>QSS | 3.29<br>3.42<br>4.96<br>3.89<br>3.54 | PCS<br>ICS<br>OCS<br>TCS | 3.05<br>3.29<br>4.96<br>3.77 |
| <b>CD004679</b> | peritoneal dialysis                                     | B: Mupirocin<br>C: Rifampin<br>A: Control                                 | Number of patients with Peritonitis          | 1 (82);<br>1 (626);<br>1 (64)             | -0.685<br>(0.777) | PSS<br>ISS<br>OSS<br>TSS<br>QSS | 3.69<br>4.23<br>4.17<br>4.03<br>5.00 | PCS<br>ICS<br>OCS<br>TCS | 3.38<br>4.13<br>4.17<br>3.89 |
| <b>CD004756</b> | acute rejection in kidney transplant                    | B: Anti-thymocyte globulin (ATG)<br>C: Muromonab-CD3<br>A: Steroid        | Failure of reversal of acute first rejection | 1 (56);<br>3 (139);<br>1 (120)            | -1.664<br>(0.84)  | PSS<br>ISS<br>OSS<br>TSS<br>QSS | 4.38<br>4.09<br>3.25<br>3.91<br>4.58 | PCS<br>ICS<br>OCS<br>TCS | 4.38<br>3.82<br>3.25<br>3.82 |
| <b>CD004785</b> | meningococcal carrier                                   | B: Ciprofloxacin<br>C: Rifampin<br>A: Placebo                             | Failure to eradicate (one week follow up)    | 2 (218);<br>3 (197);<br>6 (725)           | 3.214<br>(0.871)  | PSS<br>ISS<br>OSS<br>TSS<br>QSS | 2.88<br>4.88<br>5.00<br>4.25<br>2.18 | PCS<br>ICS<br>OCS<br>TCS | 2.38<br>4.07<br>5.00<br>3.82 |
| <b>CD004790</b> | infants of hepatitis B surface antigen-positive mothers | B: RV<br>C: PDV<br>A: Control                                             | HB event                                     | 2 (216);<br>1 (101);<br>3 (272)           | -0.007<br>(1.000) | PSS<br>ISS<br>OSS<br>TSS<br>QSS | 3.69<br>3.29<br>4.00<br>3.66<br>4.20 | PCS<br>ICS<br>OCS<br>TCS | 3.63<br>3.94<br>4.00<br>3.86 |
| <b>CD004861</b> | oral contraception                                      | B: Levonorgestrel<br>C: Norethindrone (monophasic)<br>A: Gestodene        | Discontinuation                              | 2 (1834);<br>2 (817);<br>1 (174)          | -0.353<br>(0.599) | PSS<br>ISS<br>OSS<br>TSS<br>QSS | 4.38<br>5.00<br>5.00<br>4.79<br>3.88 | PCS<br>ICS<br>OCS<br>TCS | 4.00<br>4.14<br>4.00<br>4.05 |

| CSR             | Clinical indications                     | Treatment (B; C; A)                                                                        | Outcome measures                   | No.of trials (patients):<br>BvC, AvB, AvC | Delta (SE)        | TSA scores                      |                                      | ECA scores               |                              |
|-----------------|------------------------------------------|--------------------------------------------------------------------------------------------|------------------------------------|-------------------------------------------|-------------------|---------------------------------|--------------------------------------|--------------------------|------------------------------|
|                 |                                          |                                                                                            |                                    |                                           |                   |                                 |                                      |                          |                              |
| <b>CD004879</b> | Preventing influenza in healthy children | B: Live attenuated vaccines (one dose)<br>C: Inactivated vaccines (one dose)<br>A: Placebo | Influenza                          | 2 (222);<br>2 (1646);<br>3 (1361)         | -1.495<br>(0.543) | PSS<br>ISS<br>OSS<br>TSS<br>QSS | 3.60<br>4.83<br>3.17<br>3.87<br>4.88 | PCS<br>ICS<br>OCS<br>TCS | 3.60<br>4.57<br>3.17<br>3.78 |
| <b>CD005015</b> | kidney transplant recipients             | B: Bisphosphonate<br>C: Vit D sterol<br>A: Placebo or no treatment                         | Change in BMD at lumbar spine      | 1 (31);<br>3 (150);<br>1 (62)             | -2.956<br>(2.295) | PSS<br>ISS<br>OSS<br>TSS<br>QSS | 3.13<br>3.29<br>4.05<br>3.49<br>4.17 | PCS<br>ICS<br>OCS<br>TCS | 3.13<br>2.98<br>3.88<br>3.33 |
| <b>CD005049</b> | cardioversion of atrial fibrillation     | B: Amiodarone<br>C: Sotalol<br>A: Placebo                                                  | Atrial fibrillation recurrence     | 3 (909);<br>2 (149);<br>7 (1685)          | 0.910<br>(0.547)  | PSS<br>ISS<br>OSS<br>TSS<br>QSS | 3.38<br>4.17<br>4.17<br>3.91<br>4.44 | PCS<br>ICS<br>OCS<br>TCS | 3.38<br>4.22<br>4.17<br>3.92 |
| <b>CD005115</b> | Osteoarthritis                           | B: Rofecoxib 25mg<br>C: Rofecoxib 12.5 mg<br>A: Placebo                                    | Diarrhoea (adverse effect) 6 weeks | 4 (1297);<br>3 (550);<br>1 (632)          | -1.090<br>(0.739) | PSS<br>ISS<br>OSS<br>TSS<br>QSS | 3.96<br>5.00<br>5.00<br>4.65<br>4.78 | PCS<br>ICS<br>OCS<br>TCS | 3.77<br>5.00<br>5.00<br>4.59 |
| <b>CD005129</b> | organ transplant recipients              | B: IgC<br>C: CMV IgG<br>A: Placebo/no treatment                                            | No treatment response              | 1 (18);<br>11 (595);<br>5 (175)           | -0.583<br>(1.081) | PSS<br>ISS<br>OSS<br>TSS<br>QSS | 3.22<br>4.71<br>3.00<br>3.64<br>4.03 | PCS<br>ICS<br>OCS<br>TCS | 2.78<br>3.65<br>2.92<br>3.11 |
| <b>CD005149</b> | Acute sinusitis                          | B: Mometasone 400 mcg<br>C: Mometasone 200 mcg<br>A: Placebo                               | Resolution of symptoms or improved | 1 (478);<br>1 (643);<br>1 (95)            | -1.590<br>(0.624) | PSS<br>ISS<br>OSS<br>TSS<br>QSS | 3.29<br>5.00<br>2.50<br>3.60<br>3.00 | PCS<br>ICS<br>OCS<br>TCS | 2.75<br>3.75<br>2.50<br>3.00 |

| CSR             | Clinical indications               | Treatment (B; C; A)                                                               | Outcome measures                          | No.of trials<br>(patients):<br>BvC, AvB, AvC | Delta<br>(SE)     | TSA scores                      |                                      | ECA scores               |                              |
|-----------------|------------------------------------|-----------------------------------------------------------------------------------|-------------------------------------------|----------------------------------------------|-------------------|---------------------------------|--------------------------------------|--------------------------|------------------------------|
|                 |                                    |                                                                                   |                                           |                                              |                   |                                 |                                      |                          |                              |
| <b>CD005347</b> | contraception                      | B: MLCu 375<br>C: ML Cu 250<br>A: TCu380A                                         | Pregnancy                                 | 2 (1580);<br>3 (6610);<br>1 (1962)           | 0.927<br>(0.87)   | PSS<br>ISS<br>OSS<br>TSS<br>QSS | 5.00<br>5.00<br>3.84<br>4.61<br>5.00 | PCS<br>ICS<br>OCS<br>TCS | 5.00<br>5.00<br>3.84<br>4.61 |
| <b>CD005351</b> | Cardiogenic pulmonary oedema       | B: Bilevel<br>C: Continmuous positive airway pressure<br>A: Standard medical care | Hopsital mortality                        | 6 (230);<br>9 (501);<br>4 (252)              | -0.491<br>(0.772) | PSS<br>ISS<br>OSS<br>TSS<br>QSS | 3.34<br>4.00<br>4.00<br>3.78<br>3.87 | PCS<br>ICS<br>OCS<br>TCS | 3.23<br>3.68<br>4.00<br>3.64 |
| <b>CD005593</b> | Alzheimer's disease                | B: Donepezil<br>C: Rivastimine<br>A: Placebo                                      | MMSE mean change from baseline (ITT-LOCF) | 1 (955);<br>5 (1197);<br>4 (1921)            | -0.630<br>(0.747) | PSS<br>ISS<br>OSS<br>TSS<br>QSS | 3.79<br>4.84<br>4.09<br>4.24<br>4.48 | PCS<br>ICS<br>OCS<br>TCS | 3.46<br>4.36<br>4.09<br>3.97 |
| <b>CD006003</b> | uncomplicated open cholecystectomy | B: Passive open drain<br>C: Suction drain<br>A: no drain                          | Wound infection                           | 1 (200);<br>6 (610);<br>4 (873)              | -0.263<br>(0.896) | PSS<br>ISS<br>OSS<br>TSS<br>QSS | 4.66<br>4.38<br>4.17<br>4.40<br>4.84 | PCS<br>ICS<br>OCS<br>TCS | 4.41<br>3.04<br>4.17<br>3.87 |
| <b>CD006257</b> | diabetic kidney disease            | B: AIIRA<br>C: ACEi<br>A: Placebo or no treatment                                 | All cause mortality                       | 1 (250);<br>3 (3251);<br>9 (6781)            | -0.181<br>(0.598) | PSS<br>ISS<br>OSS<br>TSS<br>QSS | 3.33<br>4.00<br>4.09<br>3.81<br>4.49 | PCS<br>ICS<br>OCS<br>TCS | 3.31<br>3.47<br>3.59<br>3.45 |

**Table S2:** Evidence table for data extraction from trials included in Cochrane systematic reviews (CSRs)

| <b>Author:</b>      |                            |                    |                    |                     |                |                            |                            |                    |
|---------------------|----------------------------|--------------------|--------------------|---------------------|----------------|----------------------------|----------------------------|--------------------|
| <b>Title:</b>       |                            |                    |                    |                     |                |                            |                            |                    |
| <b>CSR No.</b>      |                            |                    |                    |                     |                |                            |                            |                    |
| <b>Assessor:</b>    |                            | <b>Date:</b>       |                    |                     |                |                            |                            |                    |
| <b>B:</b>           |                            |                    |                    |                     |                |                            |                            |                    |
| <b>C:</b>           |                            |                    |                    |                     |                |                            |                            |                    |
| <b>A:</b>           |                            |                    |                    |                     |                |                            |                            |                    |
| <b>Outcome:</b>     |                            |                    |                    |                     |                |                            |                            |                    |
|                     |                            |                    |                    |                     |                |                            |                            |                    |
| <b>Trial (year)</b> | <b>Sample size (n1/n2)</b> | <b>Treatment-1</b> | <b>Treatment-2</b> | <b>Participants</b> | <b>Outcome</b> | <b>Length of follow up</b> | <b>Event rate or value</b> | <b>Other notes</b> |
| <b>B vC trials</b>  |                            |                    |                    |                     |                |                            |                            |                    |
|                     |                            |                    |                    |                     |                |                            |                            |                    |
|                     |                            |                    |                    |                     |                |                            |                            |                    |
|                     |                            |                    |                    |                     |                |                            |                            |                    |
|                     |                            |                    |                    |                     |                |                            |                            |                    |
| <b>Sub-total</b>    |                            |                    |                    |                     |                |                            |                            |                    |
| <b>A v B trials</b> |                            |                    |                    |                     |                |                            |                            |                    |
|                     |                            |                    |                    |                     |                |                            |                            |                    |
|                     |                            |                    |                    |                     |                |                            |                            |                    |
|                     |                            |                    |                    |                     |                |                            |                            |                    |
| <b>Sub-total</b>    |                            |                    |                    |                     |                |                            |                            |                    |

|                     |  |  |  |  |  |  |  |  |
|---------------------|--|--|--|--|--|--|--|--|
|                     |  |  |  |  |  |  |  |  |
| <b>A v C trials</b> |  |  |  |  |  |  |  |  |
|                     |  |  |  |  |  |  |  |  |
|                     |  |  |  |  |  |  |  |  |
|                     |  |  |  |  |  |  |  |  |
|                     |  |  |  |  |  |  |  |  |
|                     |  |  |  |  |  |  |  |  |
| <b>Sub-total</b>    |  |  |  |  |  |  |  |  |

Note: event rate is pooled estimate for direct comparison trials; but the event rate in control group for indirect comparison trials.

**Table S3:** Sheet for clinical similarity assessment (TSA)

| CSR No.                                    | Assessor                                        | Date |                            | B                          | C                                                                                                                   | A  | Outcome |       |
|--------------------------------------------|-------------------------------------------------|------|----------------------------|----------------------------|---------------------------------------------------------------------------------------------------------------------|----|---------|-------|
|                                            |                                                 |      |                            |                            |                                                                                                                     |    |         |       |
|                                            | Describe differences between AvB and AvC trials |      | Applicable?<br>yes-1, no-0 | Any important differences? | Is relative effect of a treatment likely to be different because of observed difference between AvB and AvC trials? |    |         |       |
|                                            | AvB                                             | AvC  |                            |                            | Yes                                                                                                                 | UC | No      | Score |
| <b>Participants</b>                        |                                                 |      |                            |                            |                                                                                                                     |    |         |       |
| Age/sex                                    |                                                 |      |                            |                            |                                                                                                                     |    |         |       |
| Diagnosis/indications                      |                                                 |      |                            |                            |                                                                                                                     |    |         |       |
| Severity/baseline risk                     |                                                 |      |                            |                            |                                                                                                                     |    |         |       |
| Duration of illness                        |                                                 |      |                            |                            |                                                                                                                     |    |         |       |
| Previous treatment failure                 |                                                 |      |                            |                            |                                                                                                                     |    |         |       |
| Settings/country                           |                                                 |      |                            |                            |                                                                                                                     |    |         |       |
| Other known relative effect moderators     |                                                 |      |                            |                            |                                                                                                                     |    |         |       |
| <b>Participant similarity score: PSS=</b>  |                                                 |      |                            |                            |                                                                                                                     |    |         |       |
| <b>Common control interventions</b>        |                                                 |      |                            |                            |                                                                                                                     |    |         |       |
| Type of interventions                      |                                                 |      |                            |                            |                                                                                                                     |    |         |       |
| Dosages/intensities                        |                                                 |      |                            |                            |                                                                                                                     |    |         |       |
| Treatment duration                         |                                                 |      |                            |                            |                                                                                                                     |    |         |       |
| Route                                      |                                                 |      |                            |                            |                                                                                                                     |    |         |       |
| Providers/setting                          |                                                 |      |                            |                            |                                                                                                                     |    |         |       |
| Complexity                                 |                                                 |      |                            |                            |                                                                                                                     |    |         |       |
| Other known relative effect moderators     |                                                 |      |                            |                            |                                                                                                                     |    |         |       |
| <b>Intervention similarity score: ISS=</b> |                                                 |      |                            |                            |                                                                                                                     |    |         |       |
| <b>Outcome measures</b>                    |                                                 |      |                            |                            |                                                                                                                     |    |         |       |
| Endpoint definition                        |                                                 |      |                            |                            |                                                                                                                     |    |         |       |
| Tools/monitoring method/procedures         |                                                 |      |                            |                            |                                                                                                                     |    |         |       |
| Length of follow up                        |                                                 |      |                            |                            |                                                                                                                     |    |         |       |

|                                                          |  |  |  |  |  |  |  |  |
|----------------------------------------------------------|--|--|--|--|--|--|--|--|
| Other known relative effect moderators                   |  |  |  |  |  |  |  |  |
| <b>Outcome similarity score: OSS=</b>                    |  |  |  |  |  |  |  |  |
| <b>Average similarity score: TSA = (PSS+ISS+OSS)/3 =</b> |  |  |  |  |  |  |  |  |

## Notes – Instructions to assessors for TSA

The assessment of similarity for AIC should be based on the major study characteristics (trial participants, interventions and outcome measures) presented in systematic reviews (study table). This should be based on information collated in Appendix 1, and additional evidence or discussions from the original CSR or primary trials included in the CSR. Assessment should focus on factors according to original systematic reviews that may possibly affect trial results or generalisability of trial results. Sample size of trial should be taken into account when there are differences in participants, interventions and outcomes among multiple AvB or among multiple AvC trials.

For each specific field of items (i.e, each row in Appendix 2), assessor first needs to decide whether the specific item is Applicable or Not Applicable. The assessor should mark "1" if Applicable and "0" if Not Applicable. When marked "0" then the score will automatically be locked at 0 and be excluded from the final score calculations in order to avoid giving a higher weight to the not applicable items. If marked "1" then the assessor needs to further decide if there are any important differences between AvB and AvC trials, and whether the relative effect of a treatment might be different because of observed differences between AvB and AvC trials. Specifically, if there are no “other known relative effect modertors” identified, this item should be marked as “not

applicable”. If case there is insufficient or missing data, the option of "Yes-missing data" or "No-Missing data" is available.

For each specific field of items (i.e, each row in Appendix 2), the assessors need to make their judgments based on a percentage score. For example if an assessor is unclear for a specific field of item due to some reason but is more inclined to mark either "Yes" or "No" depending on the available evidence then this can be divided as 30% uncertain and 70% No or 70% Yes and vice versa.

If there is any evidence that the pooled relative effect of either AvB or AvC is very likely to be different due to the observed difference between AvB and AvC trials, "Yes" should be selected with a percentage value for your judgement. It can either be 100% Yes if there is substantial evidence or the 100% could be split between "Yes and Unclear" or "Unclear and No" or "Yes, Unclear and No".

Likewise, if it is unclear whether the pooled relative effect of AvB or AvC is affected by the observed difference between AvB and AvC trials, "Uncertain" with a percentage value can be selected. If the assessor is unclear because there is no data available at all then Uncertain column can be marked as 100%. But if the assessor is unclear due to several missing data or other possible treatment moderators that may exist but only in a few trials so that the pooled relative effect may or

may not be significantly affected, then the percentage can be split according to the assessor's judgement. Therefore, the 100% can split between "Unclear and No", "Unclear and Yes" or "Unclear, Yes and No".

If there is no difference between AvB and AvC trials, or the observed difference between them is very unlikely to have any important impact on the pooled relative effect of AvB and AvC, the assessment decision should be "100% "No". This can again be split between "Unclear and No" depending on the assessor's judgement. The judgement can be based on the following situations. (1) There are no important differences between AvB and AvC trials. (2) There is no evidence or any reasons to believe that relative effect of AvB or AvC is associated with the factor or factors that are different between AvB and

AvC trials. (3) The relative effect of AvB or AvC may be associated with the factor that are different between trials, but only a very small number of (small) trials were involved and the pooled relative effect is not affected.

The final score of each item that is applicable will be converted from percentage to a score between 0-5 using the equation:

Item similarity score = (Yes% \* 0.0 + Unclear% \* 2.5 + No% \* 5.0)/100and

The total score will be the average of each applicable individual score.



**Table S4:** Sheet for Quality assessment of trials in meta-analysis (QSA)

| CSR No.                  | Assessor | Date                                       |                                          |                                           |                                       |                                               |       |
|--------------------------|----------|--------------------------------------------|------------------------------------------|-------------------------------------------|---------------------------------------|-----------------------------------------------|-------|
| B                        | C        | A                                          |                                          |                                           |                                       |                                               |       |
| <b>Outcome measured:</b> |          |                                            |                                          |                                           |                                       |                                               |       |
| Trial (year)             | Total N  | Randomisation method (adequate-1; no/uc-0) | Allocation concealment (yes-1; no/uc -0) | Blinding of participants (yes-1; no/uc-0) | Blinding of assessor (yes-1, no/uc-0) | Dropout (reported and <20% -1; uc or >20% -0) | Total |
| <b>BvC trials</b>        |          |                                            |                                          |                                           |                                       |                                               |       |
|                          |          |                                            |                                          |                                           |                                       |                                               |       |
|                          |          |                                            |                                          |                                           |                                       |                                               |       |
| <b>Weighted average</b>  |          |                                            |                                          |                                           |                                       |                                               |       |
| <b>AvB trials</b>        |          |                                            |                                          |                                           |                                       |                                               |       |
|                          |          |                                            |                                          |                                           |                                       |                                               |       |
|                          |          |                                            |                                          |                                           |                                       |                                               |       |
| <b>Weighted average</b>  |          |                                            |                                          |                                           |                                       |                                               |       |
| <b>AvC trials</b>        |          |                                            |                                          |                                           |                                       |                                               |       |
|                          |          |                                            |                                          |                                           |                                       |                                               |       |
|                          |          |                                            |                                          |                                           |                                       |                                               |       |
| <b>Weighted average</b>  |          |                                            |                                          |                                           |                                       |                                               |       |

**Note:** (1) Rows can be added according to number of trials included. (2) Need to modify cell ranges for the calculation of number of patients, and weighted average, according to number of studies included in each sets.

## Instructions to assessors for QSA

The quality of trials in AICic will be assessed based on Jadad's scale, modified according to Schulz's components. Data required to use this scale is usually available from completed CSRs. The quality of individual trials is scored as 1 for adequate and 0 for no or unclear. The quality scores of multiple trials will be weighted by the total number of patients to calculate an average quality score for each of the three sets of trails.

Randomisation method: Select "1" if appropriate method of randomisation described; and "0" if the method was unclear or inappropriate. Appropriate methods of randomisation include: table of random numbers, computer generated, coin tossing, and dice throwing. Examples of inappropriate methods include data of birth, hospital numbers, medical record numbers.

Allocation Concealment: Select "1" if trials reported using either central randomisation, numbered or coded bottles or containers, or a statement indicating that drugs were prepared by a pharmacy. A serially numbered, opaque, sealed envelope is another example of adequate allocation concealment. Select "0" if allocation concealment was unclear or inappropriate.

Blinding of participants: Select "1" if a trial reported that it was "double-blind" or participants were masked about the intervention

received or it is a placebo-controlled trial and "0" if patients were not masked.

Blinding of outcome assessor: Select "1" if a trial reported that it was "double-blind" or outcome assessors were masked about the intervention that patients received and select "0" if assessor not masked.

Drop-outs and withdrawals: Select "1" if the number of dropouts reported and <20% and select "0" if number of dropout rates reported and >20% or unclear.

The total quality score for each trial is the number of "1s"

Main references: Moher D, Cook DJ, Jadad Ar, Tugwell P, Moher M, Jones A, et al. Assessing the quality of reports of randomised trials: implications for the conduct of meta-analyses. *Health Technol Assess* 1999; 3:1-98.

### Calculating Quality Similarity Assessment (QSA) score:

Let  $QT_{AC}$  and  $QT_{BC}$  represent the average quality score for AvC trials and the average quality score for BvC trials respectively. The quality similarity assessment (QSA) score, ranging from 1 (very low) to 5 (very high) was calculated by:  $QSA = 5 - (|QT_{AC} - QT_{BC}|)$ .

**Table S5:** Sheet for evidence consistency assessment (ECS)

| CSR No.                                     | Assessor                                  | Date |                            | B                          | C                                                                                                                          | A  | Outcome |       |
|---------------------------------------------|-------------------------------------------|------|----------------------------|----------------------------|----------------------------------------------------------------------------------------------------------------------------|----|---------|-------|
|                                             |                                           |      |                            |                            |                                                                                                                            |    |         |       |
|                                             | Any differences between DC and AIC trials |      | Applicable?<br>Yes-1; no-0 | Any important differences? | Is relative effect of a treatment likely to be different because of observed difference between trials used in AIC and DC? |    |         |       |
|                                             | AIC                                       | DC   |                            |                            | Yes                                                                                                                        | UC | No      | Score |
| <b>Participants</b>                         |                                           |      |                            |                            |                                                                                                                            |    |         |       |
| Age/sex                                     |                                           |      |                            |                            |                                                                                                                            |    |         |       |
| Diagnosis/indications                       |                                           |      |                            |                            |                                                                                                                            |    |         |       |
| Severity/baseline risk                      |                                           |      |                            |                            |                                                                                                                            |    |         |       |
| Duration of illness                         |                                           |      |                            |                            |                                                                                                                            |    |         |       |
| Previous treatment failure                  |                                           |      |                            |                            |                                                                                                                            |    |         |       |
| Settings/country                            |                                           |      |                            |                            |                                                                                                                            |    |         |       |
| Other known relative effect moderators      |                                           |      |                            |                            |                                                                                                                            |    |         |       |
| <b>Participant Consistency score: PCS=</b>  |                                           |      |                            |                            |                                                                                                                            |    |         |       |
| <b>Interventions</b>                        |                                           |      |                            |                            |                                                                                                                            |    |         |       |
| Type of interventions                       |                                           |      |                            |                            |                                                                                                                            |    |         |       |
| Dosages/intensities                         |                                           |      |                            |                            |                                                                                                                            |    |         |       |
| Treatment duration                          |                                           |      |                            |                            |                                                                                                                            |    |         |       |
| Route                                       |                                           |      |                            |                            |                                                                                                                            |    |         |       |
| Providers/setting                           |                                           |      |                            |                            |                                                                                                                            |    |         |       |
| Complexity                                  |                                           |      |                            |                            |                                                                                                                            |    |         |       |
| Common control in AIC                       |                                           |      |                            |                            |                                                                                                                            |    |         |       |
| Other known relative effect moderators      |                                           |      |                            |                            |                                                                                                                            |    |         |       |
| <b>Intervention Consistency score: ICS=</b> |                                           |      |                            |                            |                                                                                                                            |    |         |       |
| <b>Outcome measures</b>                     |                                           |      |                            |                            |                                                                                                                            |    |         |       |
| Endpoint definition                         |                                           |      |                            |                            |                                                                                                                            |    |         |       |

|                                                           |  |  |  |  |  |  |  |  |
|-----------------------------------------------------------|--|--|--|--|--|--|--|--|
| Tools/monitoring method/procedures                        |  |  |  |  |  |  |  |  |
| Length of follow up                                       |  |  |  |  |  |  |  |  |
| Other known relative effect moderators                    |  |  |  |  |  |  |  |  |
| <b>Outcome Consistency score: OCS=</b>                    |  |  |  |  |  |  |  |  |
| <b>Average Consistency score: ECA = (PCS+ICS+OCS)/3 =</b> |  |  |  |  |  |  |  |  |

## Notes - Instruction to assessors for ECA

The assessment of evidence consistency between DC and AIC should be based on the major study characteristics (trial participants, interventions and outcome measures) presented in systematic reviews (study table). This should be based on information collated in Appendix 1, and additional evidence or discussions from the original CSR or primary trials in the CSR. Assessment should focus on factors according to original systematic reviews that may possibly affect trial results or generalisability of trial results. Sample size of trial should be taken into account when there are differences in participants, interventions and outcomes among multiple trials.

For each specific field of items (i.e, each row in Appendix 3), assessor first needs to decide whether the specific item is Applicable or Not Applicable. The assessor should mark "1" if Applicable and "0" if Not Applicable. When marked "0", the score will automatically be locked at 0 and be excluded from the final score calculations in order to avoid giving a higher weight to the not applicable items. If marked "1" then the assessor needs to further decide if there are any important

differences between AIC and DC trials, and whether the relative effect of a treatment might be different because of observed differences between AIC and DC trials. Specifically, if there are no “other known relative effect modertors” identified, this item should be marked as “not applicable”. In case there is insufficient or missing data, the option of "Yes-missing data" or "No-Missing data" is available and should be selected.

For each specific field of items (i.e, each row in Appendix 3), the assessors need to make their judgments based on a percentage score. For example if an assessor is unclear for a specific field of item due to some reason but is more inclined to mark either "Yes" or "No" depending on the available evidence then this can be divided as 40% uncertain and 60% No or 60% Yes and vice versa.

If there is any evidence that the pooled relative effect of either AIC or DC is very likely to be different due to the observed difference between AIC and DC trials, "Yes" should be selected with a percentage value for your judgement. It can either be 100% Yes if there is definite

evidence or the 100% could be split between "Yes and Unclear" or "Yes, Unclear and No".

Likewise, if it is unclear whether the pooled relative effect of AIC or DC is affected by the observed difference between AIC and DC trials, "Uncertain" with a percentage value can be selected. If the assessor is unclear because there is no data available at all then Uncertain column can be marked as 100%. But if the assessor is unclear due to several missing data or other possible treatment moderators that may exist but only in a few trials so that the pooled relative effect may or may not be significantly affected, then the percentage can be split according to the assessor's judgement. Therefore, the 100% could be split between "Unclear and No", "Unclear and Yes" or "Unclear, Yes and No". Please note that the Intervention Consistency Score (ICS) in the Appendix 3 could be higher than the Intervention Similarity Score (ISS) in Appendix 2 due to 8 items instead of only 7.

If there is no difference between AIC and DC trials, or the observed difference between them is very unlikely to have any important

impact on the pooled relative effect of AIC and DC, the assessment decision could be "100% No". This can again be split between "Unclear and No", "Unclear and Yes" or "Unclear, Yes and No" depending on the assessor's judgement. The judgement can be based on the following situations. (1) There are no important differences between AIC and DC trials. (2) There is no evidence or any reasons to believe that relative effect of AIC or DC is associated with the factor or factors that are different between AIC and DC trials. (3) The relative effect of AIC or DC may be associated with the factor that is different between trials, but only a very small number of (small) trials were involved and the pooled relative effect is not affected.

In principle, the total consistency score should be equal to or lower than the similarity score.

The final score of each item that is applicable will be converted from percentage to a score between 0-5 and the total score will be the average of each applicable individual score.

**Table S6:** Evidence table – topical azelaic acid vs. topical metronidazole for rosacea (case study CD003262)

|                     |                                             |                                                               |                                         |                                                                                                                                                                                                                                                                                             |                                                                   |                                   |                            |              |
|---------------------|---------------------------------------------|---------------------------------------------------------------|-----------------------------------------|---------------------------------------------------------------------------------------------------------------------------------------------------------------------------------------------------------------------------------------------------------------------------------------------|-------------------------------------------------------------------|-----------------------------------|----------------------------|--------------|
| <b>Author:</b>      | van Zuuren                                  |                                                               |                                         |                                                                                                                                                                                                                                                                                             |                                                                   |                                   |                            |              |
| <b>Title:</b>       | Interventions for rosacea                   |                                                               |                                         |                                                                                                                                                                                                                                                                                             |                                                                   |                                   |                            |              |
| <b>CSR No.</b>      | CD003262                                    |                                                               |                                         |                                                                                                                                                                                                                                                                                             |                                                                   |                                   |                            |              |
| <b>Assessor:</b>    | SP/TX                                       | <b>Date:</b>                                                  | 30/11/2009                              |                                                                                                                                                                                                                                                                                             |                                                                   |                                   |                            |              |
| <b>B:</b>           | Topical azelaic acid                        |                                                               |                                         |                                                                                                                                                                                                                                                                                             |                                                                   |                                   |                            |              |
| <b>C:</b>           | Topical metronidazole                       |                                                               |                                         |                                                                                                                                                                                                                                                                                             |                                                                   |                                   |                            |              |
| <b>A:</b>           | Placebo                                     |                                                               |                                         |                                                                                                                                                                                                                                                                                             |                                                                   |                                   |                            |              |
| <b>Outcome:</b>     | Physicians global evaluation of improvement |                                                               |                                         |                                                                                                                                                                                                                                                                                             |                                                                   |                                   |                            |              |
| <b>Trial (year)</b> | <b>Sample size (n1/n2)</b>                  | <b>Treatment-1</b>                                            | <b>Treatment-2</b>                      | <b>Participants</b>                                                                                                                                                                                                                                                                         | <b>Outcome</b>                                                    | <b>Length of follow up</b>        | <b>Event rate or value</b> | <b>Other</b> |
| <b>B v C trials</b> |                                             |                                                               |                                         |                                                                                                                                                                                                                                                                                             |                                                                   |                                   |                            |              |
| Elewski 2003        | 124/127                                     | Azelaic acid 15% gel x 2 times daily<br>Duration = 15 weeks   | Metronidazole 0.75% gel x 2 times a day | Setting: Multicentre, USA<br>N = 251; Age = 46 & 49 (mean); Sex = 66M/185F<br>Patients with papulopustular rosacea with persistent erythema and telangiectasia. 10-15 inflamed facial papules.<br>Excluded mild rosacea, marked ocular manifestations, hypersensitivity, lactating mothers. | Investigators global assessment - 7 point static scoring system   | 15 weeks (baseline every 4 weeks) | 62.2%                      |              |
| <b>Sub-total</b>    | 124/127                                     | See above                                                     | See above                               | See above                                                                                                                                                                                                                                                                                   | See above                                                         | See above                         | 62.2%                      |              |
| <b>A v B trials</b> |                                             |                                                               |                                         |                                                                                                                                                                                                                                                                                             |                                                                   |                                   |                            |              |
| Bjerke 1999         | 76/38                                       | Azelaic acid 20% cream x 2 times daily<br>Duration = 12 weeks | Placebo 2 times daily                   | Setting: Multicentre, Norway<br>N = 116; Age = 48.4 & 50.3 (mean); Sex = 55M/59F<br>Patients with papulopustular rosacea.<br>Excluded any ocular involvement.                                                                                                                               | Physician's global impression of improvement                      | 12 weeks                          | 55.3%                      |              |
| Thiboutot 2003a     | 164/165                                     | Azelaic acid 15% gel x 2 times daily<br>Duration = 12 weeks   | Placebo 2 times daily                   | Setting: Multicentre, USA<br>N = 329; Age = 48 & 49 (mean); Sex = 84M/245F<br>Patients with papulopustular rosacea (moderate), 8-50 inflamed facial papules.<br>Excluded patients with marked ocular involvement, hypersensitivity.                                                         | Investigator's global assessment - 7 point static scoring system. | 12 weeks                          | 47.9%                      |              |

|                     |         |                                                                                                        |                                        |                                                                                                                                                                                                                                                   |                                                                                  |                  |       |  |
|---------------------|---------|--------------------------------------------------------------------------------------------------------|----------------------------------------|---------------------------------------------------------------------------------------------------------------------------------------------------------------------------------------------------------------------------------------------------|----------------------------------------------------------------------------------|------------------|-------|--|
| Thiboutot 2003b     | 169/166 | Azelaic acid<br>15% gel x 2 times<br>daily<br>Duration = 12<br>weeks                                   | Placebo<br>2 times daily               | Setting: Multicentre, USA<br>N = 335; Age = 47 & 48 (mean); Sex = 93M/242F.<br>Patients with papulopustular rosacea (moderate), 8-50<br>inflamed facial papules.<br>Excluded patients with marked ocular involvement,<br>hypersensitivity.        | Investigator's<br>global<br>assessment -<br>7 point static<br>scoring<br>system. | 12 weeks         | 54.8% |  |
| <b>Sub-total</b>    | 409/369 | Azelaic acid<br>15% gel or 20%<br>cream applied 2<br>times a day<br>Duration = 12<br>weeks             | Placebo<br>2 times daily               | Setting: Multicentre, Norway, USA<br>Age = 48 (mean); Sex = >%F<br>Patients with papulopustular rosacea.<br>Excluded ocular involvement.                                                                                                          | Investigator's<br>global<br>assessment -<br>7 point static<br>scoring system     | 12 weeks         | 51.8% |  |
| <b>A v C trials</b> |         |                                                                                                        |                                        |                                                                                                                                                                                                                                                   |                                                                                  |                  |       |  |
| Bjerke 1989b        | 50/47   | Metronidazole<br>1% cream x 2<br>times daily<br>Duration = 8<br>weeks                                  | Placebo<br>2 times daily               | Setting: Multicentre, Norway<br>N = 97; Age = 47 (mean); Sex = 44M/53F<br>Patients with papulopustular rosacea, erythema and<br>telangiectasia (10 papules).<br>Excluded ocular involvement, pregnancy, lactation,<br>treatment with antibiotics. | Physician's<br>global<br>evaluation                                              | 8 weeks          | 55.3% |  |
| Breneman 1998       | 89/50   | Metronidazole<br>1% cream once<br>daily<br>Duration = 10<br>weeks                                      | Placebo                                | Setting: Multicentre, USA<br>N = 156; Age = 48.5 (mean); Sex = 51M/105F<br>Patients with papulopustular rosacea.                                                                                                                                  | Physician's<br>global<br>evaluation                                              | 10 weeks         | 2.0%  |  |
| Nielsen 1983a       | 40/37   | Metronidazole<br>1%cream x 4<br>times daily<br>Duration = 8<br>weeks                                   | Placebo<br>4 times daily               | Setting: Single, Sweden<br>N = 81; Age = 47 (mean); Sex = 32M/49F<br>Patients with rosacea of differing degrees of severity.                                                                                                                      | Physician's<br>global<br>evaluation                                              | 8 weeks          | 21.6% |  |
| <b>Sub-total</b>    | 179/134 | Metronidazole<br>1% cream once<br>daily or 2 times or<br>4 times daily.<br>Duration = 8 or 10<br>weeks | Placebo<br>Duration = 8 or 10<br>weeks | Setting: Single or Multicentre, Sweden, Norway, USA<br>Age = 47 (mean); Sex = >%F.<br>Patients with papulopustular rosacea or rosacea of differing<br>degrees of severity.                                                                        | Physician's<br>global<br>evaluation                                              | 8 or 10<br>weeks | 26.1% |  |

**Table S7: Clinical similarity assessment results – case study (CD003262)**

| Assessment items                    | Important differences between AvB and AvC trials?         | Effect modification? Yes/Uncertain/No    | Score                                   |
|-------------------------------------|-----------------------------------------------------------|------------------------------------------|-----------------------------------------|
| <b>Participants</b>                 |                                                           |                                          |                                         |
| Age/sex                             | No                                                        | 0% / 0% / 100%                           | 5.0                                     |
| Diagnosis/indications               | No                                                        | 0% / 0% / 100%                           | 5.0                                     |
| Severity/baseline risk              | Event rate in placebo arms: 48.2% vs. 73.9%               | R1: 0% / 100% / 0%<br>R2: 20% / 80% / 0% | R1: 2.5<br>R2: 2.0                      |
| Duration of illness                 | Missing data                                              | 0% / 100% / 0%                           | 2.5                                     |
| Previous treatment failure          | Missing data                                              | 0% / 100% / 0%                           | 2.5                                     |
| Settings/country                    | Norway or Germany vs. Norway or USA or Sweden             | R1: 0% / 20% / 80%<br>R2: 0% / 0% / 100% | R1: 4.5<br>R2: 5.0                      |
| Other effect moderators             | Not identified                                            |                                          |                                         |
| <b>Participant similarity</b>       |                                                           |                                          | <b>3.67</b>                             |
| <b>Common control interventions</b> |                                                           |                                          |                                         |
| Type of interventions               | No                                                        | 0% / 0% / 100%                           | 5.0                                     |
| Dosages/intensities                 | 2 times daily vs. 1 or 2 or 4 times daily                 | R1: 0% / 20% / 80%<br>R2: 0% / 50% / 50% | R1: 4.5<br>R2: 3.75                     |
| Treatment duration                  | 12 weeks vs. 8 or 10 weeks                                | R1: 0% / 20% / 80%<br>R2: 0% / 50% / 50% | R1: 4.5<br>R2: 3.75                     |
| Route                               | No                                                        | 0% / 0% / 100%                           | 5.0                                     |
| Providers/setting                   | No                                                        | 0% / 0% / 100%                           | 5.0                                     |
| Complexity                          | No                                                        | 0% / 0% / 100%                           | 5.0                                     |
| Other effect moderators             | Not identified                                            |                                          |                                         |
| <b>Intervention similarity</b>      |                                                           |                                          | <b>R1: 4.83<br/>R2: 4.58</b>            |
| <b>Outcome measures</b>             |                                                           |                                          |                                         |
| Endpoint definition                 | No                                                        | 0% / 0% / 100%                           | 5.0                                     |
| Tools/method/procedures             | 7 point static scoring or not specified vs. not specified | R1: 0% / 100% / 0%<br>R2: 20% / 80% / 0% | R1: 2.5<br>R2: 2.0                      |
| Length of follow up                 | 12 weeks vs. 8 or 10 weeks                                | R1: 0% / 100% / 0%<br>R2: 20% / 80% / 0% | R1: 2.5<br>R2: 2.0                      |
| Other effect moderators             | Not identified                                            |                                          |                                         |
| <b>Outcome similarity</b>           |                                                           |                                          | <b>R1: 3.33<br/>R2: 3.00</b>            |
| <b>Overall TSA</b>                  |                                                           |                                          | R1: 3.94<br>R2: 3.75<br><b>Av: 3.85</b> |

Note: R1 refers to reviewer 1, R2 to reviewer 2, and Av refers to average. Differences between the two assessors may remain after discussion.



**Table S8: ECA- evidence consistency assessment results –case study**  
(CD003262)

| Assessment items                | Important differences between AIC and DC trials?                                                                                           | Effect modification?<br>Yes/Uncertain/No | Score                                     |
|---------------------------------|--------------------------------------------------------------------------------------------------------------------------------------------|------------------------------------------|-------------------------------------------|
| <b>Participants</b>             |                                                                                                                                            |                                          |                                           |
| Age/sex                         | No                                                                                                                                         | 0% / 0% / 100%                           | 5.0                                       |
| Diagnosis/indications           | No                                                                                                                                         | 0% / 0% / 100%                           | 5.0                                       |
| Severity/baseline risk          | Event rate in placebo arms: 48.2% vs. 73.9%.<br>Event rate in active drug arms: AIC 28.9% and 49.7% versus DC 30.7% and 44.9% respectively | R1: 0% / 100% / 0%<br>R2: 20% / 80% / 0% | R1: 2.5<br>R2: 2.0                        |
| Duration of illness             | Missing data                                                                                                                               | 0% / 100% / 0%                           | 2.5                                       |
| Previous treatment failure      | Missing data                                                                                                                               | 0% / 100% / 0%                           | 2.5                                       |
| Settings/country                | AIC: Norway or Germany or USA or Sweden.<br>DC: USA                                                                                        | R1: 0% / 20% / 80%<br>R2: 0% / 0% / 100% | R1: 4.5<br>R2: 5.0                        |
| Other effect moderators         | Not identified                                                                                                                             |                                          |                                           |
| <b>Participant consistency</b>  |                                                                                                                                            |                                          | <b>3.67</b>                               |
| <b>Interventions (A vs B)</b>   |                                                                                                                                            |                                          |                                           |
| Type of interventions           | No                                                                                                                                         | 0% / 0% / 100%                           | 5.0                                       |
| Dosages/intensities             | AIC: TAA 20% or 15% x2 daily vs. TM cream 1% x1 or 2 or 4 daily.<br>DC: TAA newly developed gel 15% x2 daily vs. TM gel 0.75% x2 daily     | 20% / 80% / 0%                           | 2.0                                       |
| Treatment duration              | AIC: 8 or 10 or 12 weeks.<br>DC: 15 weeks.                                                                                                 | 20% / 80% / 0%                           | 2.0                                       |
| Route                           | No                                                                                                                                         | 0% / 0% / 100%                           | 5.0                                       |
| Providers/setting               | No                                                                                                                                         | 0% / 0% / 100%                           | 5.0                                       |
| Complexity                      | No                                                                                                                                         | 0% / 0% / 100%                           | 5.0                                       |
| Common control in AIC           | Placebo 12 weeks vs. 8 or 10 weeks                                                                                                         | R1: 0% / 0% / 100%<br>R2: 0% / 50% / 50% | R1: 5.0<br>R2: 3.75                       |
| Other effect moderators         | Not identified                                                                                                                             |                                          |                                           |
| <b>Intervention consistency</b> |                                                                                                                                            |                                          | <b>R1: 4.14<br/>R2: 3.96</b>              |
| <b>Outcome measures</b>         |                                                                                                                                            |                                          |                                           |
| Endpoint definition             | No                                                                                                                                         | 0% / 0% / 100%                           | 5.0                                       |
| Tools/method/procedures         | AIC 7 point static scoring or not specified vs. DC 7 point scoring                                                                         | R1: 0% / 100% / 0%<br>R2: 20% / 80% / 0% | R1: 2.5<br>R2: 2.0                        |
| Length of follow up             | AIC 8 or 10 or 12 weeks vs. DC 15 weeks.                                                                                                   | R1: 0% / 100% / 0%<br>R2: 20% / 80% / 0% | R1: 2.5<br>R2: 2.0                        |
| Other effect moderators         | Not identified                                                                                                                             |                                          |                                           |
| <b>Outcome consistency</b>      |                                                                                                                                            |                                          | <b>R1: 3.33<br/>R2: 3.00</b>              |
| <b>Overall ECS</b>              |                                                                                                                                            |                                          | <b>R1: 3.71<br/>R2: 3.54<br/>Av: 3.63</b> |

Note: TAA – topical azelain acid. TM – topical metronidazole. R1 - Reviewer 1; R2 - Reviewer 2; Av - Average. Difference between the two assessors may remain after discussion.

**Table S9:** Assessment of quality of studies included – case study (CD003262)

| Trial (year)                            | Total N    | Randomisation method (adequate-1; no/unclear-0) | Allocation concealment (yes-1; no/unclear -0) | Blinding of participants (yes-1; no/unclear-0) | Blinding of assessor (yes-1, no/unclear-0) | Dropout (reported and <20% -1; unclear or >20% - 0) | Total        |
|-----------------------------------------|------------|-------------------------------------------------|-----------------------------------------------|------------------------------------------------|--------------------------------------------|-----------------------------------------------------|--------------|
| <b>BvC trials</b>                       |            |                                                 |                                               |                                                |                                            |                                                     |              |
| Elewski 2003                            | 251        | 1                                               | 1                                             | 1                                              | 1                                          | 1                                                   | 5            |
| <b>Weighted average</b>                 | <b>251</b> |                                                 |                                               |                                                |                                            |                                                     | <b>5.000</b> |
| <b>A v B trials</b>                     |            |                                                 |                                               |                                                |                                            |                                                     |              |
| Bjerke 1999                             | 114        | 0                                               | 0                                             | 1                                              | 1                                          | 1                                                   | 3            |
| Thiboutot 2003a                         | 329        | 1                                               | 1                                             | 1                                              | 1                                          | 1                                                   | 5            |
| Thiboutot 2003b                         | 335        | 1                                               | 1                                             | 1                                              | 1                                          | 1                                                   | 5            |
| <b>Weighted average</b>                 | <b>778</b> |                                                 |                                               |                                                |                                            |                                                     | <b>4.707</b> |
| <b>A v C trials</b>                     |            |                                                 |                                               |                                                |                                            |                                                     |              |
| Bjerke 1989b                            | 97         | 1                                               | 1                                             | 1                                              | 1                                          | 1                                                   | 5            |
| Breneman 1998                           | 139        | 0                                               | 0                                             | 1                                              | 1                                          | 1                                                   | 3            |
| Nielsen 1983a                           | 77         | 1                                               | 1                                             | 1                                              | 1                                          | 1                                                   | 5            |
| <b>Weighted average</b>                 | <b>313</b> |                                                 |                                               |                                                |                                            |                                                     | <b>4.112</b> |
| <b>QSA score = 5 – ABS(QAC – QBC) =</b> |            |                                                 |                                               |                                                |                                            |                                                     | <b>4.405</b> |
